# Impact of chromatin context on Cas9-induced DNA double-strand break repair pathway balance.

Ruben Schep<sup>1,2,\*</sup>, Eva K. Brinkman<sup>1,2,\*</sup>, Christ Leemans<sup>1,2</sup>, Xabier Vergara<sup>1,2,3</sup>, Ben Morris<sup>4,5</sup>, Tom van Schaik<sup>1,2</sup>, Stefano G. Manzo<sup>1,2</sup>, Daniel Peric-Hupkes<sup>1,2</sup>, Jeroen van den Berg<sup>1,2,3</sup>, Roderick L. Beijersbergen<sup>4,5</sup>, René H. Medema<sup>1,3</sup>, Bas van Steensel<sup>1,2,&</sup>.

<sup>1</sup>Oncode Institute, <sup>2</sup>Division of Gene Regulation, <sup>3</sup>Division of Cell Biology, <sup>4</sup>Division of Molecular Carcinogenesis, <sup>5</sup>Robotics Screening Center, Netherlands Cancer Institute, Amsterdam, the Netherlands.

\*Shared first author

&Correspondence: [b.v.steensel@nki.nl](mailto:b.v.steensel@nki.nl)

## Abstract

DNA double-strand break (DSB) repair is mediated by multiple pathways, including classical non-homologous end-joining pathway (NHEJ) and several homology-driven repair pathways. This is particularly important for Cas9-mediated genome editing, where the outcome critically depends on the pathway that repairs the break. It is thought that the local chromatin context affects the pathway choice, but the underlying principles are poorly understood. Using a newly developed multiplexed reporter assay in combination with Cas9 cutting, we systematically measured the relative activities of three DSB repair pathways as function of chromatin context in >1,000 genomic locations. This revealed that NHEJ is broadly biased towards euchromatin, while microhomology-mediated end-joining (MMEJ) is more efficient in specific heterochromatin contexts. In H3K27me<sub>3</sub>-marked heterochromatin, inhibition of the H3K27 methyltransferase EZH2 shifts the balance towards NHEJ. Single-strand templated repair (SSTR), often used for precise CRISPR editing, competes with MMEJ, and this competition is weakly associated with chromatin context. These results provide insight into the impact of chromatin on DSB repair pathway balance, and guidance for the design of Cas9-mediated genome editing experiments.

## 32 INTRODUCTION

33

34 The repair of DNA double strand breaks (DSBs) is crucial for genetic stability. In addition, it is a key step  
35 in CRISPR/Cas9-mediated genome editing (Jasin and Haber, 2016; Yeh et al., 2019). Several pathways can  
36 repair DSBs, including classical non-homologous end-joining (NHEJ), homologous recombination (HR)  
37 and microhomology-mediated end-joining (MMEJ) (McVey and Lee, 2008; Iliakis et al., 2015; Chang et  
38 al., 2017; Scully et al., 2019; Yeh et al., 2019). NHEJ directly re-joins blunt-ended DSBs, while HR  
39 typically uses the intact sister chromatid in G2 phase as a template to mend the break. In contrast, MMEJ  
40 recombines short homologous sequences that are close to either end of the DSB, and consequently results  
41 in a small deletion. An additional variant is single-stranded template repair (SSTR), a type of homology-  
42 directed repair that requires a single-stranded oligodeoxynucleotide (ssODN) donor sequence (Lin et al.,  
43 2014; Richardson et al., 2016). SSTR is highly relevant because it is leveraged in CRISPR/Cas9-mediated  
44 genome editing to generate precisely designed small mutations, such as point mutations or small insertions  
45 or deletions (indels) (DeWitt et al., 2016; Okamoto et al., 2019; Riesenberger et al., 2019).

46 Which pathway repairs a particular DSB depends in part on the local DNA sequence (Allen et al.,  
47 2018; Shen et al., 2018; Chakrabarti et al., 2019; Chen et al., 2019) and on the stage of the cell cycle  
48 (reviewed in Chapman et al., 2012; Hustedt and Durocher, 2016; Mladenov et al., 2016). In addition, local  
49 chromatin packaging can affect the choice of repair pathway (Jeggo and Downs, 2014; Clouaire and  
50 Legube, 2015; Kalousi and Soutoglou, 2016; Scully et al., 2019). Most studies of chromatin effects so far  
51 have focused on the balance between HR and NHEJ. For example, the histone modification H3K36me3,  
52 which is present along active transcription units, is thought to promote HR (Daugaard et al., 2012; Aymard  
53 et al., 2014; Carvalho et al., 2014; Pfister et al., 2014; Clouaire et al., 2018). Paradoxically, H3K9 di- or  
54 trimethylated (H3K9me2/3) heterochromatin, which packages transcriptionally inactive regions of the  
55 genome, has also been implicated in promoting HR (Sun et al., 2009; Baldeyron et al., 2011; Lee et al.,  
56 2013; Soria and Almouzni, 2013; Alagoz et al., 2015), although some single-locus studies in mouse and  
57 fruit fly found no major change in the balance between NHEJ and HR when a sequence was shifted between  
58 heterochromatin and euchromatin states (Janssen et al., 2016; Kallimasioti-Pazi et al., 2018). Furthermore,  
59 reduced binding of HR proteins was observed at a locus that was artificially tethered to the nuclear lamina  
60 (Lemaitre et al., 2014), suggesting that spatial positioning of the DSB inside the nucleus may also play a  
61 role.

62 Much less is known about the impact of chromatin on MMEJ and SSTR. Like HR, these pathways  
63 require resection of the DNA ends to produce single-stranded DNA overhangs, but downstream of this step  
64 the mechanisms and responsible proteins diverge (Chang et al., 2017; Scully et al., 2019; Yeh et al., 2019).

65 It is thus possible that the local chromatin environment also modulates MMEJ and SSTR in unique ways,  
66 but this has remained largely unexplored (Clouaire and Legube, 2019; Mitrentsi et al., 2020).

67 One strategy to investigate the impact of local chromatin context on repair pathway balance is to  
68 generate DSBs at various genomic locations with known chromatin states, and compare pathway utilization  
69 across these locations (van Overbeek et al., 2016; Clouaire et al., 2018; Chakrabarti et al., 2019). However,  
70 with such an approach it is difficult to separate the effects of chromatin context from the effects of sequence  
71 context, because both vary simultaneously along the genome. Ideally, different chromatin contexts are  
72 compared while the sequence context is kept fixed.

73 Here, we report a strategy that effectively tackles these challenges in human cells. The strategy  
74 consists of two parts. First, we developed a reporter that, when cut with Cas9, produces distinct “scars”  
75 when repaired by either NHEJ, MMEJ or SSTR; high-throughput sequencing of these scars provides highly  
76 accurate measurements of the relative activities of the three pathways. Second, we used a modification of  
77 our TRIP method (Akhtar et al., 2013) to insert this reporter into >1,000 random genomic locations, tracking  
78 each individual reporter in parallel by molecular barcoding. We thus systematically measured the relative  
79 activities of NHEJ, MMEJ and SSTR as function of chromatin context in >1,000 genomic locations. This  
80 yielded unique datasets that (1) comprehensively sample the broad diversity of chromatin ‘flavors’ across  
81 the entire genome; (2) bypass the confounding effects of varying sequence context; (3) probe three of the  
82 most relevant pathways, with high accuracy and sensitivity. The results provide a detailed view of the  
83 impact of chromatin context on the relative activities of the three repair pathways.

84

## 85 **RESULTS**

86

### 87 **Multiplexed DSB repair pathway assay: principle.**

88 We developed a strategy to measure the relative activity of several DSB repair pathways in more  
89 than one thousand genomic locations that include all known common chromatin states. The strategy  
90 employs a pathway-specific reporter construct that contains a short DNA sequence (derived from the human  
91 *LBR* gene) that predominantly produces a +1 insertion or a -7 deletion when cut at a specific base pair (bp)  
92 position by Cas9 (**Figure 1A**). We previously found that these two indels are primarily the result of NHEJ  
93 (+1) and MMEJ (-7), respectively (Brinkman et al., 2018) and we provide additional support below. The  
94 relative abundance of these signature indels can therefore be interpreted as a measure of the relative activity  
95 of these two pathways. Furthermore, this readout can be extended to include SSTR (see below). We note  
96 that HR cannot be detected with this assay, because HR generally repairs DSBs perfectly, and perfectly  
97 repaired DNA cannot be distinguished from uncut DNA. However, we previously estimated that perfect

98 repair of this reporter sequence is rare, and by inference that the contribution of HR is likely to be very  
99 minor (Brinkman et al., 2018).

100 With this reporter, we implemented a variant of the TRIP technology (Akhtar et al., 2013) to  
101 systematically probe the effects of many chromatin environments on the repair pathway usage. We inserted  
102 the reporter sequence into a PiggyBac transposon vector, together with a 16 bp random barcode sequence  
103 that was located 56 bp from the DSB site (**Figure 1B**). We then randomly integrated this construct into the  
104 genomes of pools of K562 cells (**Figure 1C**). We chose K562 cells because the chromatin landscape has  
105 been extensively characterized (**Table S1-2**) (Encode Project Consortium, 2012; Schmidl et al., 2015;  
106 Schwalb et al., 2016; Chen et al., 2018; Ott et al., 2018; Shah et al., 2018). From this pool, we also generated  
107 a number of clones for smaller scale experiments. Each copy of the integrated reporter carried a different  
108 barcode. We mapped the genomic locations of these Integrated Pathway Reporters (IPRs) together with  
109 their barcode sequences by inverse PCR (Akhtar et al., 2013). Next, after Cas9-mediated DSB induction  
110 and the ensuing repair, we determined the accumulated spectrum of indels of each individual IPR in a  
111 multiplexed fashion, by PCR amplification (see primer locations in **Figure 1C**) followed by high-  
112 throughput sequencing. Because each barcode is linked to its genomic location, the location specific  
113 sequence information enabled us to infer the relative DSB repair pathway usage at each location.  
114 Comparison of the resulting data to the local chromatin state of the IPRs then provides insight into the  
115 impact of chromatin context on DSB repair pathway usage.

116

### 117 **Implementation and validation of the multiplexed reporter assay.**

118 For these experiments we used a human K562 cell line that expresses Cas9 protein in an  
119 inducible manner (Brinkman et al., 2018). We generated two cell pools with 979 and 1099 (total 2078)  
120 uniquely mapped IPRs (**Figure 2A; Figure S1A**). In addition, we established 14 clonal cell lines, for  
121 which the barcodes and locations were also mapped. On average these clones carried 6.8 integrations,  
122 which we take as an estimate of the numbers of integrations per cell in the cell pools. For some additional  
123 analyses described below, we used one clone (clone 5) with 19 mapped IPRs that are located across most  
124 major chromatin types (**Figure S1A, B**).

125 Next, we induced Cas9 in the cell pools by ligand-dependent stabilization (Banaszynski et al.,  
126 2006) and transfection with the sgRNA (named sgRNA-LBR2). We collected genomic DNA after 64 hours  
127 and determined the indel spectra of all IPRs. At this time point, indel accumulation in the *LBR* gene has  
128 reached near-saturation (Brinkman et al., 2018). After applying stringent quality criteria (see Methods) we  
129 obtained robust indel spectra of 1229 IPRs (**Figure S1A**); the other IPRs were mostly discarded because  
130 they were insufficiently represented in the cell pools. Overall, the IPRs of both pools showed a similar  
131 pattern of indels as the endogenous *LBR* sequence in the same cells, dominated by +1 and -7 indels (**Figure**

132 **2B, C; Figure S1C, D**). This supports previous findings that the sequence determines the overall indel  
133 pattern (van Overbeek et al., 2016; Allen et al., 2018; Shen et al., 2018; Chakrabarti et al., 2019; Chen et  
134 al., 2019), but we also observe clear variations in indel frequencies.

135 As noted before (Brinkman et al., 2018), the -7 deletions come in two variants that both involve  
136 3-nucleotide microhomologies (**Figure 1A**), consistent with MMEJ. To further verify that the +1 and -7  
137 indels indeed represent NHEJ and MMEJ, respectively, we depleted or inhibited several pathway-specific  
138 proteins (Chang et al., 2017; Scully et al., 2019) in either the pools or clone 5 (**Figure S2**). The +1 insertion  
139 was strongly reduced and the -7 deletion was increased by inhibition of DNA-PKcs by the compounds  
140 NU7441 (**Figure S2A, B**) or M3814 (**Figure S2C**). DNA-PKcs is a key component of NHEJ (Gottlieb and  
141 Jackson, 1993). In contrast, the -7 deletions but not the +1 insertion were selectively reduced upon depletion  
142 of DNA polymerase theta (POLQ) and CtIP, which are proteins of the MMEJ pathway (Sartori et al., 2007;  
143 Chan et al., 2010; Mateos-Gomez et al., 2015) (**Figure S2D, E**). Knockdown of Rad51 also caused a slight  
144 reduction in -7 deletions with a negligible change in +1 insertions (**Figure S2D, E**), while in yeast Rad51  
145 inhibits MMEJ activity by promoting HR instead (Villarreal et al., 2012; Deng et al., 2014). Aside from  
146 this latter experiment, all other evidence indicates that the +1 and -7 indels are primarily the result of NHEJ  
147 and MMEJ, respectively.

148

#### 149 **Effects of chromatin context on overall indel frequencies.**

150 Using the indel spectra from the two cell pools, we first investigated the impact of chromatin  
151 context on total indel frequencies (TIF; i.e., the proportion of reporter sequences carrying any type of indel).  
152 Across the IPRs these frequencies varied from ~25% to ~100% (**Figure 3A, B**). This variation most likely  
153 reflects differences in either the cutting efficiency by Cas9, or the DSB repair rate, or both. We repeated  
154 these experiments with three different sgRNAs targeting different sequences in the same reporter (**Figure**  
155 **3A, B**). This yielded overall indel frequencies that strongly correlated with sgRNA-LBR2 and with each  
156 other, although with sgRNA-LBR2 we may have approximated saturation of indels more than with the  
157 other sgRNAs (**Figure 3B, C**).

158 Because the sequences of the IPRs are identical (except for the short barcodes located 56 bp from  
159 the cut site), the differences in indel frequencies across integration sites are presumably due to variation in  
160 the local chromatin environment. To investigate this, we correlated the indel data for each sgRNA with a  
161 curated set of 24 genome-wide maps of chromatin features that represent most of the known main chromatin  
162 types (**Table S1-2**). The IPRs lack gene regulatory elements and are only 640 bp long, and may thus be  
163 expected to adopt the local chromatin state. Chromatin immunoprecipitation experiments for three histone  
164 modifications generally confirmed this (**Figure S3**). This is consistent with previous studies showing that  
165 integrated reporters adopt and strongly respond to the local chromatin state (Akhtar et al., 2013; Corrales

166 et al., 2017; Leemans et al., 2019). We therefore assume that the chromatin state of the integration positions  
167 is a reasonable approximation of the chromatin state of the IPRs themselves.

168 Overlaying of the indel frequencies with the 24 chromatin maps revealed that overall indel  
169 frequencies generally correlated positively with various markers of euchromatin and negatively with  
170 markers of heterochromatin. These correlations were highly consistent between the four sgRNAs that we  
171 tested (**Figure 3D**). On average, IPRs integrated in heterochromatin regions showed lower indel frequencies  
172 than in euchromatic regions. However, within heterochromatin the magnitude of this effect varied  
173 depending on the specific combination of features (**Figure 3E, F**). The most pronounced effect was  
174 observed in regions marked by the combination of H3K9me2, lamina-associated domains (LADs), and late  
175 replication. In these regions the distribution of indel frequencies appears to be bimodal, suggesting that  
176 another unknown feature plays an important role as well. Remarkably, when H3K27me3 is additionally  
177 present the reduction of indel frequencies is less pronounced, and regions marked by H3K27me3 alone only  
178 slightly affect indel frequencies compared to euchromatin. Thus, H3K27me3 only mildly impedes Cas9  
179 editing and may even counteract the effects of other heterochromatin features. Regions marked by  
180 H3K9me2 together with either late replication or lamina interactions (but not both) show only marginally  
181 reduced indel frequencies, compared to the triple-marked regions (**Figure 3E, F**). For euchromatin regions,  
182 we did not survey combinatorial effects, because there are too many possible combinations and hence  
183 statistical power is insufficient.

184 Together, these results indicate that the overall indel frequency depends on the local chromatin  
185 context, and that heterochromatin features are correlated with the efficiency of indel accumulation in a  
186 combinatorial manner. These effects may be through modulation of Cas9 cutting efficiency, modulation of  
187 indel-forming repair rates, or both.

188

### 189 **Impact of chromatin context on MMEJ:NHEJ balance.**

190 Next, we analyzed the variation in the *balance* between MMEJ and NHEJ, throughout this paper  
191 referred to as “MMEJ:NHEJ balance” and defined for each IPR as the number of -7 reads over the sum of  
192 -7 and +1 reads. This balance varied profoundly depending on the integration site (**Figure 4A, B; S4A**).  
193 Strikingly, NHEJ activity correlated generally positively with markers of euchromatin. NHEJ showed the  
194 strongest positive correlations with H3K4me1, H3K4me2 and H3K27ac, which are histone modifications  
195 that primarily mark enhancers and to a lesser extent promoters (Gasperini et al., 2020). The strongest  
196 negative correlations of NHEJ included multiple markers of heterochromatin such as H3K27me3,  
197 H3K9me2 and LADs (**Figure 4C; S4B**). MMEJ showed the inverse relationships (**Figure 4C; S4B**). Within  
198 heterochromatin we further explored whether certain combinations of chromatin features are more  
199 predictive than others. The strongest effect on the balance was observed in IPRs located in regions marked

200 by the combination of H3K9me2, late replication and LADs (**Figure 4D, S4C**). Regions marked by two of  
201 these three features showed less pronounced but significant increases in MMEJ:NHEJ balance compared  
202 to euchromatin regions, as did regions marked by H3K27me3 (**Figure 4D, S4C**).

203 Overall, the patterns of MMEJ:NHEJ balance (**Figure 4D**) and indel frequencies (**Figure 3E**)  
204 appeared to mirror each other. Indeed, across all IPRs there is a substantial inverse correlation between  
205 both variables (**Figure 4E**). In other words, the shift towards MMEJ in heterochromatin is tightly linked  
206 to a reduction in total indel frequencies. It is likely that these reduced indel frequencies in  
207 heterochromatin are at least in part explained by lower cutting frequencies by Cas9, due to the compacted  
208 state of heterochromatin. However, it seems improbable that the cutting rate *itself* determines the pathway  
209 balance; possible models will be discussed below.

210 Other indels that could not be assigned to either MMEJ or NHEJ showed only weak correlations,  
211 with modest trends in the same direction as MMEJ (**Figure 4C; S4B**). Some of these larger deletions also  
212 tend to contain microhomologies but are more complex and too infrequent to be reliably categorized as  
213 MMEJ. Altogether, these data show that the balance between MMEJ and NHEJ is broadly linked to the  
214 global heterochromatin/euchromatin dichotomy, and within heterochromatin depends on the combination  
215 of heterochromatin features that are locally present.

216

### 217 **Gradual activation of MMEJ across chromatin types.**

218 To explore how the difference in pathway balance between heterochromatin and euchromatin  
219 develops over time after DSB induction, we conducted time series experiments. We used a robotics setup  
220 to collect DNA samples every three hours over a period of three days following Cas9 activation. For these  
221 experiments we focused on clone 5; because all 19 IPRs in this clone are in the same cell, their repair  
222 kinetics can be directly compared.

223 As expected, Cas9 activation resulted in a gradual accumulation of +1 and -7 indels in all IPRs,  
224 concomitant with a loss of wild-type sequence (**Figure 5A, S5**). These kinetics were generally slower in  
225 regions in LADs that are also marked by H3K9me2 and late replication (e.g. IPR 7, 14 and 16, **Figure**  
226 **S5**). Remarkably, the MMEJ:NHEJ balance was not constant over time, but was strongly skewed towards  
227 NHEJ at the early time points and gradually shifted towards MMEJ for all IPRs, culminating in a plateau  
228 approximately 50 hours after Cas9 activation (**Figure 5B**). This points to a slow activation of the MMEJ  
229 pathway, as we had observed previously for a single locus (Brinkman et al., 2018). This activation of  
230 MMEJ may occur eventually at most DSBs. However, over time the pathway balance diverged between  
231 IPRs in different chromatin environments, with several heterochromatic IPRs developing a higher  
232 MMEJ:NHEJ balance than most euchromatin regions (**Figure 5B**). This underscores that heterochromatic

233 DSBs are intrinsically more prone to be repaired by MMEJ than euchromatic DSBs, but only once MMEJ  
234 is activated.

235

### 236 **Overall robustness of pathway balance in heterochromatin.**

237 We then investigated the role of several heterochromatin features in pathway balance by  
238 perturbation experiments. To distinguish direct from indirect effects, we compared the MMEJ:NHEJ  
239 balance of IPRs in regions with the targeted feature to that of IPRs in regions already lacking the feature  
240 prior to treatment. Direct effects should primarily alter the MMEJ:NHEJ balance in regions originally  
241 marked by the feature.

242 We first reduced the levels of H3K9me2 by treatment with the G9a-inhibitor BIX01294 (**Figure**  
243 **S6A-C**). This did not alter the MMEJ:NHEJ balance in H3K9me2 domains, except when in combination  
244 with LADs and late replication, where the balance increased slightly ( $p = 0.02$ ; **Figure S6A**). We then tested  
245 the effect of GSK126, a compound that inhibits the H3K27me3 methyltransferase EZH2 and causes a global  
246 loss of H3K27me3 (**Figure S6D, E**). This inhibitor caused a significant reduction of the MMEJ:NHEJ  
247 balance in H3K27me3-only domains compared to euchromatin regions ( $p = 2e-11$ ), as well as in virtually  
248 all domain combinations that were also covered by H3K27me3 (**Figure 6A**). Unexpectedly, GSK126  
249 treatment also reduced levels of H3K9me2 (**Figure S6B, C**), and also slightly lowered the MMEJ:NHEJ  
250 balance in the triple H3K9me2, LAD and late replicating domains ( $p = 5.6e-05$ ), but not in the single  
251 H3K9me2 domains. The most prominent shift in balance was, however, in H3K27me3 domains, pointing  
252 to a local effect of this histone modification on MMEJ:NHEJ balance.

253 Finally, because IPRs in LADs often show a high MMEJ:NHEJ balance, we used CRISPR/Cas9  
254 editing to derive cell lines from clone 5 that lacked Lamin A/C (LMNA) or Lamin B Receptor (LBR)  
255 (**Figure S6F-I**). These two lamina proteins are important for the peripheral positioning of heterochromatin  
256 (Clowney et al., 2012; Solovei et al., 2013), and LMNA has been implicated in the control of NHEJ by  
257 sequestering 53BP1 (Redwood et al., 2011). Using the pA-DamID method (van Schaik et al., 2019) we  
258 mapped genome-wide changes in lamina interactions in four knock out (KO) clones each of LMNA and  
259 LBR. LMNA KO cells showed very few changes in lamina interactions, while the LBR KO clones showed  
260 a large number of regions with either gains or losses in lamina interactions. A detailed analysis of these  
261 changes will be reported elsewhere. Here, we investigated whether changes in lamina interactions of the  
262 IPRs coincided with changes MMEJ:NHEJ balance.

263 The majority of the IPRs did not undergo substantial changes in lamina interactions in either the  
264 LMNA or LBR KO clones compared to the parental clone 5, and they also did not show significant changes  
265 in MMEJ:NHEJ balance (**Figure S7A**). An exception was IPR2, in which the lamina interactions became  
266 stronger in all four LBR KO clones (**Figure 6B, C**). However, the MMEJ:NHEJ balance in IPR2 was not



267 detectably altered in these clones (**Figure 6C, S7B**). This suggests that lamina contacts do not modulate  
268 this balance, but we cannot rule out that effects on this balance only emerge when lamina contacts are  
269 stronger than those of IPR2 in the LBR KO clones (note that the lamina interaction z-score in these clones  
270 is around 0, which corresponds to the genome-wide average level of lamina interactions). Interestingly,  
271 IPR17 showed a marked increase in the MMEJ:NHEJ balance in two of the four LBR KO clones (**Figure**  
272 **6D-E, S7A**). However, for this IPR the lamina interactions did not change (**Figure S7C**), and we do not  
273 understand why only two of the four clones show this behavior. Nevertheless, this result underscores that  
274 it is possible to shift the MMEJ:NHEJ balance in an IPR markedly without any change in its sequence.  
275 Presumably an unknown change in the local chromatin state in the two clones is responsible for this.

276 Together, these data indicate that the MMEJ:NHEJ balance in specific heterochromatin types is not  
277 easily shifted by targeting individual key markers of the respective heterochromatin types. Pathway balance  
278 may be redundantly controlled by multiple factors in each heterochromatin type. Nevertheless, depletion of  
279 H3K27me3 did cause a detectable reduction in MMEJ:NHEJ balance in heterochromatin domains that  
280 normally carry this mark.

281

### 282 **Impact of chromatin context on SSTR.**

283 Finally, we investigated a third repair pathway: SSTR, which is commonly used to create specific  
284 mutations by CRISPR/Cas9 editing. We hypothesized that this pathway competes with NHEJ and MMEJ,  
285 and that its relative activity may also be modulated by the local chromatin environment. To test this, we  
286 triggered DSB formation in our reporter sequence in the presence of a template ssODN containing a specific  
287 +2 insertion (ssODN insertion) (**Figure S8A**). We designed this insertion within the PAM site, so that a  
288 successful editing event destroyed the PAM site and prevented further cutting by Cas9. We then transfected  
289 the IPR cell pools with this ssODN (together with the sgRNA) to probe the impact of chromatin context on  
290 the relative activity of SSTR, NHEJ and MMEJ in parallel. In these experiments, we found that a median  
291 6% of the indels consisted of the SSTR insertion (**Figure S8B**). Accumulation of this insertion was mostly  
292 at the expense of the -7 deletion but not of the +1 insertion (**Figure 7A, S8C, D**), suggesting a competition  
293 between SSTR and MMEJ. Indeed, depletion of POLQ (a key protein of MMEJ) caused an increase in  
294 ssODN insertions (**Figure S2D, E**). Consistent with an earlier study (Richardson et al., 2018), we find that  
295 knockdown of CtIP, a factor that promotes end-resection (Sartori et al., 2007) strongly reduces SSTR and  
296 MMEJ activity (**Figure S2D, E**). This suggests that DSB end-resection is an early step in SSTR.  
297 Furthermore, in the presence of DNA-PKcs inhibitor NU7441 the ssODN insertion was increased while the  
298 +1 insertion was reduced (**Figure 7A, Figure S2E**), indicating that the ssODN insertion does not result  
299 from NHEJ. In agreement with previous work (Richardson et al., 2018) we conclude that SSTR is distinct  
300 from NHEJ and MMEJ.

301 MMEJ and SSTR correlate rather poorly with each other across the IPRs (**Figure S8E**). In the  
302 presence of NU7441 this correlation was even weaker (**Figure S8F**). This lack of correlation implies that  
303 the two pathways are largely subject to different local control mechanisms. We therefore searched for  
304 chromatin features that may explain this. Like MMEJ, SSTR generally correlates positively with  
305 heterochromatin features and negatively with euchromatin features, but the correlations are overall weaker  
306 than observed for MMEJ and NHEJ (**Figure 7B; S8G, H**). The proportion of DSBs repaired by SSTR is  
307 highest in heterochromatic regions marked by H3K9me2 and LADs, either with or without late replication;  
308 and in regions marked by H3K27me3 (**Figures 7C, S8I**). Searching for chromatin features that might  
309 explain the MMEJ:SSTR balance differences, we found only minor differences in this balance between  
310 chromatin types, with regions triple-marked by H3K9me2, LADs and late replication showing the most  
311 pronounced skew towards MMEJ. Other regions marked by one or two heterochromatin features showed  
312 only marginal effects compared to euchromatic regions (**Figure 7D, S8J**).

313 Finally, we compared the timing of SSTR and MMEJ. For this, we conducted time series  
314 experiments in the presence of NU7441 to reduce NHEJ activity, in order to maximize barcode reads with  
315 SSTR and MMEJ indels (**Figure 7E, S9**). Individual time curves suggest that SSTR tends to become active  
316 at the DSBs earlier than MMEJ. Indeed, plotting the MMEJ:SSTR balance as a function of time shows that  
317 this balance is initially strongly skewed towards SSTR, and only gradually shifts towards MMEJ (**Figure**  
318 **7F**). This shift is particularly pronounced in heterochromatin triple-marked by H3K9me2, LADs and late  
319 replication, and slightly less in H3K27me3 regions (**Figure 7F**). Altogether these results demonstrate that  
320 MMEJ and SSTR compete, that their balance is at least in part controlled by the local chromatin context,  
321 and that SSTR is activated earlier than MMEJ.

322

323

## 324 **DISCUSSION**

325

326 Here, we present a powerful reporter system to query effects of chromatin on DSB pathway usage. It  
327 consists of (1) a simple short DNA sequence that, when cut with Cas9, produces a signature indel for each  
328 repair pathway; and (2) an adaptation of the TRIP multiplexed reporter assay (Akhtar et al., 2013). In  
329 combination, these tools offer precise measurements of the relative activity of NHEJ, MMEJ and SSTR,  
330 combined with the throughput that is needed to query the impact of a wide diversity of chromatin contexts.  
331 The sequencing-based "scar-counting" readout renders the assay highly quantitative and can provide  
332 detailed insights into the repair kinetics. Moreover, the large number of randomly integrated IPRs provides  
333 a broad sampling of all common chromatin contexts (Akhtar et al., 2013).

334 Using this approach in human cells, we found that the balance between MMEJ and NHEJ varies  
335 >5-fold across chromatin contexts. Generally, heterochromatin is more prone to repair by MMEJ than  
336 euchromatin, but this shift depends on the precise heterochromatin features that are present. It is possible  
337 that euchromatin carries one or more features that activate or recruit the NHEJ machinery, or conversely  
338 that certain heterochromatin features promote MMEJ. If the latter is true, then it should be considered that  
339 multiple heterochromatin features can play such a role, since H3K27me3 modulates the MMEJ:NHEJ  
340 balance in H3K27me3-marked heterochromatin, but this does not explain the high MMEJ:NHEJ balance  
341 in heterochromatin marked by late replication, H3K9me2 and lamina interactions.

342 An alternative model builds on our observation that MMEJ is only slowly activated. A DSB in  
343 "open" euchromatin may be rapidly accessed and repaired by NHEJ, often before MMEJ has been activated.  
344 In contrast, in heterochromatin a DSB may be inaccessible to either pathway until the heterochromatin is  
345 de-compacted. This remodeling of heterochromatin may be a slow process, which would allow time for  
346 MMEJ to be activated and giving both MMEJ and NHEJ a more similar chance to repair the DSB. Indeed,  
347 DSB-induced unfolding of heterochromatin has been reported (Goodarzi et al., 2008; Chiolo et al., 2011;  
348 Jakob et al., 2011; Ryu et al., 2015; Janssen et al., 2016; Tsouroula et al., 2016). However, as seen by  
349 microscopy, this remodeling process occurs within ~20 minutes, while we found that MMEJ activation  
350 takes several hours. It is possible that additional biochemical or structural changes in heterochromatin are  
351 involved that take place over a time scale of hours. We also considered that one early cutting event in  
352 euchromatin may trigger slow upregulation of MMEJ activity globally throughout the nucleus, which would  
353 then increase the probability of MMEJ repairing a DSB that is formed later in heterochromatin (which may  
354 be cut more slowly). However, this explanation seems unlikely, because early breaks caused by ionizing  
355 radiation do not boost MMEJ repair at a Cas9 cut ~16 hours later (Brinkman et al., 2018). This result  
356 suggests that the slow MMEJ activation does not occur globally throughout the nucleus, but rather locally  
357 at the DSB.

358 Interestingly, SSTR does not show the same delay as MMEJ, and has a clear advantage over MMEJ  
359 in heterochromatin early after DSB induction. Because both pathways require end-resection, this result  
360 implies that end-resection is not the rate limiting step responsible for the delayed MMEJ. Indeed, rapid  
361 localization of end-resection proteins at DSBs inside heterochromatin has been observed (Chiolo et al.,  
362 2011).

363 As summarized in the Introduction, previous studies have addressed the impact of specific  
364 chromatin contexts or proteins on NHEJ and HR, but generally did not monitor MMEJ and SSTR. While  
365 the latter two pathways share components with HR, they are mechanistically distinct, and thus the effects  
366 of chromatin context may differ. For example, several previous studies have indicated that H3K36me3,  
367 which is generally present along active transcription units, promotes HR (Aymard et al., 2014; Carvalho et

368 al., 2014; Pfister et al., 2014; Clouaire and Legube, 2015). We find H3K36me3 to correlate negatively with  
369 MMEJ. Possibly, HR and MMEJ respond differently to H3K36me3, or the repair of Cas9-induced breaks  
370 differs from breaks induced by other means.

371 The activities of MMEJ and SSTR that we detect indicate that end-resection is generally not  
372 impeded by various types of heterochromatin. Previous work has pointed to a role of HP1 $\alpha$  and HP1 $\beta$  in  
373 recruiting proteins involved in end-resection (Soria and Almouzni, 2013), but not all types of  
374 heterochromatin are marked by these proteins. Our data indicate that multiple heterochromatin components  
375 contribute locally to promoting MMEJ and SSTR. This includes LADs, which is in agreement with a  
376 previous study that implicated various MMEJ-specific proteins in the repair of DSBs near the nuclear  
377 lamina (Lemaitre et al., 2014).

378 The results obtained in this study have practical implications for genome editing by means of Cas9.  
379 First, the efficiency of Cas9 editing is generally lower in most types of heterochromatin compared to  
380 euchromatin. This has been noted before, but based on data that covered only a small number of loci that  
381 did not compare all heterochromatin types (Chen et al., 2016; Daer et al., 2017; Jensen et al., 2017;  
382 Kallimasioti-Pazi et al., 2018). Our data indicate that Cas9 editing is primarily suppressed in regions that  
383 carry a combination of lamina interactions, late replication and H3K9me2. Most likely the relatively low  
384 accessibility of the DNA in these loci is preventing efficient cutting by Cas9. Regions that carry only one  
385 of these marks, or H3K27me3, show only a modestly reduced editing efficiency.

386 From a genome editing perspective, the skew towards the MMEJ and SSTR pathways in  
387 heterochromatin is a convenient compensation for the lower overall editing efficiency, because MMEJ and  
388 SSTR are generally more useful than NHEJ to generate specific types of mutations. MMEJ is better suited  
389 to generate frameshifts and deletions that can result in functional knockout of genes, while SSTR is  
390 particularly useful to generate specifically designed mutations. Maps of heterochromatin features are thus  
391 useful resources to choose the optimal target loci for CRISPR/Cas9 editing, particularly when combined  
392 with algorithms that predict editing outcomes based on sequence (van Overbeek et al., 2016; Allen et al.,  
393 2018; Shen et al., 2018; Chakrabarti et al., 2019; Chen et al., 2019).

394 This work complements a recent study that employed a multiplexed reporter for DNA mismatch  
395 repair, which did not find significant effects of chromatin context on the repair outcome (Pokusaeva et al.,  
396 2019). Another multiplexed integrated reporter study also found evidence that genomic location can affect  
397 Cas9 editing efficiency (Gisler et al., 2019), but these results were more difficult to interpret because the  
398 reporter sequence itself was not transcriptionally inert. Importantly, neither of these studies addressed the  
399 impact of chromatin context on the balance between specific DSB repair pathways. Our multiplexed  
400 reporter assay provides new opportunities to systematically investigate the role of local chromatin context  
401 in DSB repair by multiple pathways. Moreover, our time-series experiments demonstrate that the assay can

402 be performed in 96-well format, making it scalable for applications such as drug screens and CRISPR  
403 screens. In the future, the assay may also be modified to include the detection of DSB resection or other  
404 intermediates, and perhaps of HR activity.

405

406 **Acknowledgments.**

407 We thank the NKI Genomics, Flow Cytometry and Research High Performance Computing core facilities  
408 for excellent support, and members from our laboratories for inspiring and helpful discussions. Supported  
409 by ZonMW-TOP grant 91215067 (to R.H.M. and B.v.S.) and NIH Common Fund “4D Nucleome” Program  
410 grant U54DK107965 (B.v.S.). SGM is funded by Marie-Curie/AIRC iCARE2.0 fellowship 800924. The  
411 Oncode Institute is partly supported by KWF Dutch Cancer Society.

412

413 **Author contributions.**

414 Conceived and designed study: E.K.B., R.S., R.H.M., B.v.S.

415 Experiments: R.S., E.K.B., X.V., T.v.S., S.G.M., D.P.H., B.M., J.v.d.B.

416 Data processing, bioinformatics, figure preparation: C.L., R.S., E.K.B., T.v.S., X.V., S.G.M.

417 Supervision, project management: B.v.S., R.H.M., R.L.B.

418 Manuscript writing: R.S., E.K.B., B.v.S., with input from all authors.

419

## 420 **METHODS**

421

### 422 *Constructs*

423 The IPR-PB-BC (PiggyBac) construct was derived from the pPTK-Gal4-tet-Off-Puro-IRES-eGFP-sNRP-  
424 pA-trim1 plasmid (GenBank accession KC710229). The enhanced green fluorescent protein (eGFP)  
425 expression transcription unit including promoter, the puromycin resistance cassette (PuroR) and the internal  
426 ribosome entry site (IRES) were replaced with the sgRNA-LBR2 target sequence and its flanking region.  
427 This plasmid did contain a point mutation which was removed by restriction cloning using a derivative of  
428 plasmid with a shortened 3'ITR of 67 bp (pPTK-P.CMV.584-eGFP-trim1-PI04 – kindly provided by  
429 Alexey Pindyurin and Waseem Akhtar). The target sequence was obtained by annealing ODS001 and  
430 ODS002 (400 pM each) (for primer sequences see [Table S4](#)) in 50  $\mu$ l MyTaq Red mix followed by 5 cycles  
431 of PCR. This PCR product was then further amplified with TAC0001 and TAC0002 (50 pM each). This  
432 sequence was then inserted in the PB backbone by restriction cloning with NheI and KpnI. This construct  
433 (IPR-PB) was then used to make the barcoded plasmid libraries, the 3'-ITR of PiggyBac was amplified with  
434 primers TAC0003 (containing a 16 nucleotide random barcode) and TAC0004. The PCR product was  
435 digested with KpnI and BssHII, ligated into the KpnI and MluI sites of the IPR-PB plasmid and transformed  
436 into CloneCatcher DH5 $\alpha$  electrocompetent *E. coli* (Genlantis - C810111). A pool of ~500,000 transformed  
437 bacterial cells were grown and plasmids were purified, resulting in the IPR-PB plasmid library. The PB  
438 transposase expression vector (mPB-L3-ERT2-mCherry) is described in (Akhtar et al., 2014). The sgRNAs  
439 were designed using CHOPCHOP (Montague et al., 2014) and cloned into expression vector pBlue-sgRNA  
440 (Brinkman et al., 2018) (see [Table S4](#)). The sgRNA sequences are listed in [Table S3](#).

441

### 442 *Cell culture*

443 We used clonal cell line K562#17, which is a human K562 cell line stably expressing DD-Cas9 (Brinkman  
444 et al., 2018). K562#17 cells were cultured in RPMI 1640 (Life Technologies) supplemented with 10% fetal  
445 bovine serum (FBS, HyClone®), 1% penicillin/streptomycin. Mycoplasma tests, performed every 1-2  
446 months, were negative.

447

### 448 *Generation of IPR cell pools*

449 Cell pools carrying IPRs were produced as described (Akhtar et al., 2014). Briefly, K562#17 cells were  
450 transfected with 32  $\mu$ g of barcoded IPR-PB-BC plasmid library and 6  $\mu$ g of PB transposase plasmid using  
451 Lipofectamine 2000 (ThermoFisher #11668019). Mock-transfected (without PB transposase) and GFP  
452 plasmid controls were included. After 24 h, the cells were sorted by fluorescence-activated cell sorting  
453 (FACS) based on mCherry signals. We discarded cells without any detectable mCherry signal, because they

454 most likely failed to take up any plasmid. 0.5  $\mu$ M of 4-hydroxytamoxifen (4-OHT) was added to the samples  
455 to activate the transposase. Sixteen hours later the cells were washed to remove 4-OHT. After sorting, the  
456 population was grown for 8 days to clear the cells from free plasmid. Then, the mCherry negative cells  
457 were FACS sorted in aliquots of  $\sim$ 2000 cells, which were expanded to establish two cell pools, each with  
458 a different collection of IPRs. We also isolated single cells to make clonal TRIP lines, including clone 5.

459

#### 460 *LMNA & LBR knock out generation*

461 One million clone 5 cells were transfected with 3  $\mu$ g of plasmid expressing the following sgRNAs per  
462 clone: LMNA\_KO1 & LMNA\_KO2 (each 1.5  $\mu$ g) for LMNA KO 1 and 2; LMNA\_KO4 for LMNA KO 3  
463 and 4; LBR\_KO1 for LBR KO 1-4 (**Table S3**), and cultured in complete RPMI medium with 500 nM  
464 Shield-1 (to activate Cas9) for 3 days. To obtain individual clones, cells were plated in two 96-well plates  
465 by limiting dilution (2 cells per mL; 100  $\mu$ l per well). Each clone was then tested by TIDE (Brinkman et  
466 al., 2014) for frameshifts in all alleles (primers in **Table S3**). For each sgRNA we selected two clones with  
467 complete frameshifts for further experiments.

468

#### 469 *siRNA lipofection*

470 All siRNAs were obtained from Dharmacon as ON-TARGETplus Smartpool and transfected with the  
471 RNAiMAX Transfection kit (Thermo) at a final concentration of 25 nM, 24h prior to sgRNA  
472 electroporation. Samples were collected 24h after electroporation for subsequent western blotting analysis.

473

#### 474 *Western blots*

475 Whole-cell extracts of  $\sim$ 0.5x10<sup>6</sup> cells were prepared by washing cultures in PBS and lysing with 50  $\mu$ L  
476 lysis buffer (Tris pH 7.6, 10% SDS, Roche cOmplete™ Protease Inhibitor Cocktail). Western blotting was  
477 performed according to standard procedures using the following antibodies and dilutions: H3K27me3  
478 (1:1000 Cell Signaling C36B11, rabbit), H3K9me2 (1:1000 Upstate 07-441, rabbit).

479

#### 480 *Transfection of sgRNA plasmids and ssODN*

481 For transient transfection of the sgRNAs, 1 to 6 x10<sup>6</sup> cells (lower limit for clonal experiments, higher limit  
482 for pooled experiments) were resuspended in transfection buffer (100 mM KH<sub>2</sub>PO<sub>4</sub>, 15 mM NaHCO<sub>3</sub>, 12  
483 mM MgCl<sub>2</sub>, 8 mM ATP, 2 mM glucose (pH 7.4)) (Hendel et al., 2014). After addition of 3.0-9.0  $\mu$ g plasmid,  
484 the cells were electroporated in an Amaxa 2D Nucleofector using program T-016. DD-Cas9 was induced  
485 directly or  $\sim$ 16 hours after transfection with a final concentration of 500 nM Shield-1 (Aobious). To probe  
486 SSTR, 3-9  $\mu$ g sgRNA was co-transfected with 1.5-4.5  $\mu$ g ssODN (5'  
487 TAGAATGCTAGCGTGACTGGAGTTCAGACGTGTGCTCTTCCGATCTAATTTCTACTTCATAAT

488 AAAGTGA~~ACT~~CCCAGGCCATCGACAICTCTTACCACTTCACCATCGGCAAATTTCTACTTG  
489 GCATT 3', Ultramer grade, IDT). The specific mutation that disrupts the PAM is underlined.

490

#### 491 *Inhibitor treatments*

492 DNA-PKcs inhibitor NU7441 (Cayman; diluted 1:1000 from 1 mM stock in dimethylsulfoxide [DMSO]),  
493 M3814 (MedChemExpress; diluted 1:1000 from 1 mM stock in DMSO), GSK126 (Selleckchem; diluted  
494 1:2000 from 1 mM stock in DMSO), BIX01294 (Sigma; diluted 1:1000 from 1 mM stock in H<sub>2</sub>O), or  
495 respective solvent-only controls at equal volumes, was added to the cells at the same time when the cells  
496 were supplemented with Shield-1 to induce DD-Cas9 or 24 hours prior to nucleofection for GSK126 and  
497 BIX01294. DMSO was also present in the experiments in figures 3, 4, 5, 6b, 7, S2, S4, S5, S6a-d, S7.

498

#### 499 *TIDE method*

500 The TIDE method was performed as described in (Brinkman et al., 2014). Briefly, PCR reactions were  
501 carried out with ~100 ng genomic DNA in MyTaq Red mix (Bioline) and purified using the PCR Isolate  
502 II PCR and Gel Kit (Bioline) or by ExoSAP (for primers see [Table S4](#)). ExoSAP was done by adding 0.125  
503 µl Shrimp Alkaline Phosphatase (1U/µl; New England Biolabs, M0371S), 0.0125 µl Exonuclease I (20  
504 U/µl; New England Biolabs, M0293S) and 2.3625 µl H<sub>2</sub>O per 10 µl PCR reaction. Samples were incubated  
505 30 minutes at 37 °C and inactivated for 10 minutes at 95 °C. About 2 µl (50-100 ng) of purified PCR  
506 product was then subjected to Sanger Sequencing by Eurofins Genomics. The sequence traces were  
507 analyzed using the TIDE analysis tool (<https://tide.nki.nl>).

508

#### 509 *Immunostaining of the KO clones*

510 Coverslips were first coated with 0.1% (w/v) poly-L-lysine (Sigma-Aldrich, #P8920) for 15 minutes,  
511 washed with H<sub>2</sub>O (1x) and PBS (3x) and stored in 70% ethanol for later use. 1 x 10<sup>6</sup> cells for each KO clone  
512 of LMNA and LBR were collected, centrifuged (3 minutes, 500 g) and washed once in PBS. Cells were  
513 resuspended in 90 µl PBS and added dropwise to a dry, poly-lysine coated coverslip (for WT 300 µl PBS  
514 over 4 coverslips). After 10 minutes, cells were fixed by adding dropwise 1 ml of 2.5% formaldehyde in  
515 PBS and fixed for 10 min at room temperature (RT). Coverslips were washed once with PBS and  
516 permeabilized cells with 0.5% NP40/PBS for 10 min at RT and washed again with PBS. Coverslips were  
517 transferred cell-side up on parafilm in a hybridization container and blocked for 15 minutes at RT in 90 µl  
518 1% BSA/PBS, before overnight incubation at 4°C with primary antibody mixes (1:500 Lamin B1 antibody  
519 (Abcam ab16048, rabbit), 1:200 Lamin B2 antibody (Abcam ab8983, mouse), 1:100 LBR antibody (Abcam  
520 ab122919, rabbit) or 1:100 Lamin A/C antibody (Cell Signaling sc-6215, goat)). After three washes with  
521 1% BSA/PBS, coverslips were incubated with a secondary antibody. For Lamin B1 (rabbit) we used 1:100



522 B26 Jackson rabbit 594 (Jackson 711-585-152). For LaminB2 (mouse) we used 1:100 B25 Jackson mouse  
523 594 (Jackson 715-585-150). For LBR (rabbit) we used 1:100 B12 rabbit FITC (Jackson 711-095-152). For  
524 Lamin A/C (goat) we used 1:100 B13 goat FITC (Jackson 705-095-147). This was followed by washes  
525 with PBS (3x) and H<sub>2</sub>O (1x), and mounted with Vectashield + DAPI (Vector Laboratories, #H-1200).

526

#### 527 *pA-DamID*

528 pA-DamID maps were generated and processed as described (van Schaik et al., 2019). Briefly, 1 million  
529 cells were collected by centrifugation (3 minutes, 500g) and washed in ice-cold PBS and subsequently in  
530 ice-cold digitonin wash buffer (DigWash) (20 mM HEPES-KOH pH 7.5, 150 mM NaCl, 0.5 mM  
531 spermidine, 0.02% digitonin, protease inhibitor cocktail). Cells were resuspended in 200  $\mu$ L DigWash with  
532 1:100 mouse Lamin B2 antibody (Abcam, ab8983) and rotated for 2 hours at 4°C, followed by a wash step  
533 with 0.5 mL DigWash buffer. This was repeated with a 1:100 mouse anti-rabbit antibody (Abcam, ab6709)  
534 and 1 hour of rotation, and afterwards with 1:100 pA-Dam (~60 NEB units). After two washes with  
535 DigWash, cells were resuspended in 100  $\mu$ L DigWash supplemented with 80  $\mu$ M SAM to activate Dam  
536 and incubated for 30 minutes at 37°C. Genomic DNA was extracted using the ISOLATE II Genomic DNA  
537 kit (Bioline cat. no. BIO-52067) and DNA was processed for high-throughput sequencing similar to  
538 conventual DamID (Vogel et al., 2007; Leemans et al., 2019), except that the DpnII digestion was omitted.  
539 To control for DNA accessibility and amplification bias, 1 million permeabilized cells (without any  
540 antibodies bound) were incubated with 4 units of Dam enzyme (NEB, M0222L) during the activation step.  
541 This sample functions as “dam-control” over which a log<sub>2</sub>-ratio is determined. Log<sub>2</sub>-ratios were converted  
542 to z-scores to account for small differences in dynamic range between experiments.

543

#### 544 *Generation of indel sequencing libraries*

545 After 64 hour incubation, the cells were collected and genomic DNA was extracted using the ISOLATE II  
546 Genomic DNA kit (Bioline cat. no. BIO-52067). PCR was performed in two steps and pooled experiments  
547 were performed in triplicates for a higher coverage. IndelPCR1 was performed with 200 ng genomic DNA  
548 each using primers TAC0007 (indexed) and TAC0012 that amplify 1 bp upstream of the barcode 46 bp  
549 downstream of the cut-site (see [Figure 1A, Table S4](#)). indelPCR2 used 2  $\mu$ l of each indelPCR1 product  
550 with TAC0009 and either TAC0011 (non-indexed) or TAC0159 (indexed). Each sample was generated  
551 with a unique combination of one or two indexes. Both PCR reactions were carried out with 25  $\mu$ l MyTaq  
552 Red mix (Bioline cat. no. BIO-25044), 0.5  $\mu$ M of each primer and 50  $\mu$ l final volume. PCR conditions for  
553 both steps were 1 min at 95 °C, followed by 15 sec at 95 °C, 15 sec at 58 °C and 1 min at 72 °C (5x),  
554 followed by 15 sec at 95 °C, 15 sec at 65 °C and 1 min at 72 °C (10x). The indelPCR2 was pooled per  
555 experiment after quantification on a 1% agarose gel and cleaned up using CleanPCR (CleanNA) beads at

556 0.8:1 beads : sample ratio. The purified PCR product was run on a 1% agarose gel cut out to remove  
557 remaining primer dimers and cleaned with PCR Isolate II PCR and Gel Kit (Bioline). The purified libraries  
558 were sequenced on an Illumina HiSeq2500 or MiSeq depending on the expected complexity of the library.

559

#### 560 *Time Series*

561 Sample collection in the time series experiments was done automatically using a Hamilton Microlab®  
562 STAR equipped with a Cytomat 2 C450 incubator. One million cells were transfected as described above  
563 with either the sgLBR2 plasmid alone or with the ssODN. After 16 hours, 40,000 cells in 100 µl medium  
564 were seeded per well in 96-well plates. The automated system then added 100 µl RPMI medium (with 1  
565 µM Shield-1) to each well, for a final 500 nM Shield-1 concentration. The first time point was directly  
566 collected and required a brief centrifugation step (10 seconds at 300g) to precipitate the cells, before  
567 returning the cell culture plate to the robot. Then for each timepoint 170 µl medium was removed from the  
568 well and discarded, the left-over was mixed and transferred to a new 96-well PCR plate at 8 °C. Each newly  
569 collected well was then filled with 50 µl of DirectPCR® Lysis (Viagen Cat. No. 302-C) buffer with 1 mg/ml  
570 Proteinase K (Bioline, Cat. No. BIO-37084) to pre-lyse the cells. The cell culture plate was returned to the  
571 incubator and every 3 hours a new timepoint was collected as described above. One 96-well plate included  
572 4 timeseries of each 24 timepoints. After 69 hours the collection of samples was finished and the cell lysates  
573 were sealed and incubated for 3 hours at 55 °C and heat-inactivated for 10 minutes at 95 °C.

574

#### 575 *Timeseries sequencing library preparation*

576 Library preparation for the timeseries was very similar to the pool experiments except for indelPCR1. 20  
577 µl of crude lysate was used in a total PCR volume of 80 µl, with 40 µl MyTaq HS Red mix (Bioline, BIO-  
578 25048) and 0.5 µM of each primer. PCR cycles were as described above.

579

#### 580 *Mapping of IPR integration sites: experimental methods*

581 Mapping of IPR integration sites was performed in two replicates by inverse PCR (iPCR) followed by 2 x  
582 75 bp paired end sequencing on an Illumina HiSeq2500 as previously described (Akhtar et al., 2014).

583

#### 584 *Mapping of IPR integration sites: computational methods*

585 Linking of IPR barcodes to the integration sites was adapted from (Akhtar et al., 2013). Reads of both  
586 replicates were pooled. The first read in each read pair was used to extract the barcode. This was done using  
587 the ‘GTCACAAGGGCCGCCACAAC’ constant sequence followed by a regular expression  
588 ‘TCGAG[ACGT]{16}TGATC’. From the sequence matching this regular expression, the 16 bp barcode

589 was extracted. To identify barcodes arising from mutations during PCR and sequencing, *starcodes v1.1*  
590 (Zorita et al., 2015) was used with the sphere clustering setting and a maximum Levenshtein distance of 2.

591 The second read of each pair was used to locate the site of integration after removing the  
592 ‘GTACGTCACAATATGATTATCTTTCTAGGGTTAA’ sequence matching the transposon arm. The  
593 flanking sequence was aligned to GRCh38 using *bowtie2* using the *very-sensitive-local* option (20 seed  
594 extension attempts, up to 3 re-seed attempts for repetitive seeds, 0 mismatches per seed, with a seed-length  
595 of 20 and using a multi-seed function:  $f(x) = 1 + 0.5\sqrt{x}$ ). Locations of integration sites were required to  
596 be supported by at least 5 reads with an average mapping quality larger than 10 at the primary location,  
597 having at least 95% of the reads located at this locus, with not more than 2.5% of the reads at a secondary  
598 location.

599

#### 600 *Indel scoring*

601 Indel reads after induction and repair of DSBs consist of single-end reads of 150 bp that span both the DSB  
602 site and the barcode. Indel scoring was adapted from (Brinkman et al., 2018). Barcodes were extracted from  
603 the reads with an in-house script using functions of *cutadapt 1.11*. The 16 bp barcode was located using the  
604 20 bp constant ‘GTCACAAGGGCCGGCCACAA’ sequence preceding the barcode and ‘TGATCGGT’  
605 expected immediately after the barcode. For the 20 bp constant sequence, 2 mismatches were allowed.

606 To determine the indel size in each read, we used the distance (number of nucleotides) between  
607 two fixed sequences at the start and at the end of the read. The indel size was calculated as the difference  
608 between the measured distance and the expected distance based on the wild-type sequence. We used the  
609 following anchor sequences: before the break site, ‘TGATCGGT’ and after the break site, ‘GGAGTT’,  
610 ‘CACTTT’, ‘ATTATG’, ‘GAAGTA’ and ‘ATTAGA’. The most proximal match found with these sequences  
611 was used to calculate the indel size by subtracting the expected location from the observed location.  
612 Insertions and deletions have indel sizes  $>0$  and  $<0$ , respectively. Wild-type sequence is defined as indel  
613 size 0. Point mutations were not analyzed. Per replicate experiment we observed a median 16.4% sequence  
614 reads in which we could not find a match with the constant parts; we discarded these reads in subsequent  
615 analyses. Potentially these represent large deletions, complex mutations, sequencing errors or a combination  
616 thereof.

617 Per barcode, the reads of all technical replicates were pooled if applicable. Mutated barcodes  
618 were included or discarded as described above for the mapping of IPR integrations. Because in the cell  
619 pools not all IPRs are equally represented (the cell pools consist of a mix of clones that each carry different  
620 IPRs, and some cell clones grow faster than others), we then discarded IPRs that were too underrepresented  
621 to provide reliable data. Specifically, we required that each IPR is represented by at least 50 cells among  
622 the ~100,000 cells that were used in each experiment. We assumed an average of 6 IPRs per cell.

623 Accordingly, the number of total reads per IPR was divided by the library size and multiplied by  $6 * 100000$   
624 to obtain the estimated number of cells for each IPR. IPRs for which this score was  $>50$  were used for  
625 subsequent analyses. Then each replicate was normalized over library size and biological replicates were  
626 averaged. The frequency of each indel type as proportion of total reads was calculated on that average.  
627 Pathway frequency per IPR was calculated as a proportion of the specific mutation over all indels (excluding  
628 wild-type sequences).

629

### 630 *Preprocessing of previously published epigenome data*

631 Published ChIP-seq data from various sources (**Table S1**) were re-processed for consistency. Raw  
632 sequencing data were obtained from the Sequence Read Archive (<https://www.ncbi.nlm.nih.gov/sra/>).  
633 Reads were aligned to the human genome GRCh38 using *bowtie2* with default options. Replicate datasets  
634 were processed separately, while the sequences from the input were combined. After alignment, reads were  
635 filtered on a minimum mapping quality of 30. Duplicate reads were removed except for the reads coming  
636 from experiments using tagmentation, in which duplicates were kept. After this, genomic regions were  
637 masked based on blacklist regions identified by the ENCODE project (ENCF419RSJ) (Encode Project  
638 Consortium, 2012) and putative artifact regions were identified based on the input reads using *chipseq-*  
639 *greylis*, a python implementation of GreyListChIPs (<https://doi.org/doi:10.18129/B9.bioc.GreyListChIP>).  
640 We considered ChIP-seq datasets to be of sufficient quality for our analyses if there was well annotated  
641 input and sample data available and consistent read lengths were used. Mean ChIP-seq signals for IPR  
642 integration sites were calculated by taking the sum of the reads in a region of 2 kb around the IPR, scaling  
643 input and sample counts by the smallest library size, adding a pseudo count of 1 and subsequently dividing  
644 sample over input normalized counts. After this, replicate experiments were averaged. For domain calling,  
645 ChIP-seq signals were calculated in similar fashion for bins of 5kb. *HMMt*, an R package implementing a  
646 Hidden Markov model with t emission, was used to subsequently call domains  
647 (<https://github.com/guil1aume/HMMt>).

648 DamID data of Lamin B1 are from (Leemans et al., 2019). The DamID score was calculated by  
649 scaling counts to the smallest library size, adding a pseudocount of 1 and dividing over Dam-only.. The  
650 normalized dam-only score was  $\log_2$ -transformed before averaging between replicates to calculate the dam  
651 accessibility score. Replication timing data was obtained from the 4DN data portal in the form of read  
652 coverage for late and early fraction separately. Counts were processed in the same way as for the ChIP data.  
653 For TTseq coverage from forward and reverse tracks were summed and the lowest coverage score above  
654 zero was used as pseudo count before  $\log_2$ -transforming and averaging between replicates. For DNase  
655 hypersensitivity data of both paired-end and single-end sequencing reactions were used from encode.  
656 Coverage tracks were used and for the single ended reaction a small pseudo count of half the minimum

657 value above 0 was used before log<sub>2</sub> transforming. Paired-end and single-end coverage was log<sub>2</sub> transformed  
658 before averaging. Whole genome bisulfite sequencing tracks from encode were used and coverage was  
659 calculated and log<sub>2</sub> transformed without the need for a pseudo count. Replicates were subsequently  
660 averaged. Data sources are available in [Table S2](#).

661 Z-scores of above chromatin information for the clonal line was calculated by using the mean and  
662 standard deviation of the signals in the TRIP pool.

663 For pA-DamID on the knock-out clones and clone 5, the scores were calculated in a window 10kb  
664 up and downstream from the IPR. Except for the different window size, pA-DamID scores were calculated  
665 similar to the overall DamID scores. Z-scores for pA-DamID were calculated using the mean and standard  
666 deviation of the pA-DamID score for 20kb binned tracks over the whole genome using the same formula  
667 as for the individual IPR's.

668 The following formula was used to calculate Z-scores:

$$669 \quad z\text{-score} = \frac{\text{signal} - \text{mean}}{\text{standard deviation}}$$

670

671

#### 672 *Chromatin immunoprecipitation analysis of IPRs*

673 Chromatin immunoprecipitation was performed as described (Schmidt et al., 2009). Main steps and  
674 modifications are described here. 50 µl protein A Dynabeads™ were precleared with 0.5% BSA, 5 µl of  
675 specific antibody (H3K4me1: Abcam ab8895; H3K27me3: Active Motif 39155; H3K27ac: Active Motif  
676 39133) and beads incubated at 4°C overnight. 10 million clone 5 cells were fixed at a final concentration  
677 of 1% formaldehyde for 10 minutes. Fixation was quenched with 125 mM glycine for 5 minutes and a PBS  
678 wash. After nuclear extraction, chromatin was sonicated (~8 cycles 30 sec on / 30 sec off in BioRuptor  
679 Pico), Triton-X-100 added to a final concentration of 1% and centrifuged to remove cell debris. Antibody  
680 coupled beads were washed with 0.5% BSA in PBS, chromatin was added (5% was kept as input) and  
681 rotated overnight at 4°C. Beads were washed 10 times with RIPA buffer and once with TBS. After last  
682 wash, 200 µl of elution buffer was added and samples eluted and de-crosslinked at 65°C overnight. 200 µl  
683 of TE buffer and 0.9 µl of 10mg/ml RNase A was added the samples and were incubated at 37°C for 1  
684 hour and with 4 µl of 20mg/ml Proteinase K at 55°C for 2 hours. DNA was extracted by phenol:chloroform  
685 extraction and resuspended in 50 µl of 10nM Tris-HCl. IPR barcodes were collectively amplified using  
686 primers the two step PCR described above with slight modifications. For indelPCR1, 100ng DNA was  
687 taken from input samples and same input volume added from pull-downs. IndelPCR1 was performed in a  
688 final volume of 50 µl, with 25µl MyTaq HS Red mix and 0.5 µM of each primer (TAC0007 and TAC0012).  
689 5µl of indelPCR1 was taken as input for indelPCR2. This PCR was performed in a final volume of 50µl,

690 with 25µl of MyTaq Red mix and 0.5 µM of each primer (TAC0009 and TAC0159) for 12 PCR cycles (3  
691 cycles with 58°C annealing followed by 9 cycles with 65°C annealing). PCR products were pooled, purified  
692 as described above, and sequenced on an Illumina MiSeq.

693

#### 694 *Time series analyses*

695 Indels in clone 5 were identified and counted as described above. Indel frequencies and MMEJ:NHEJ  
696 balance was calculated before averaging across replicates. Only IPRs mapped to a single genomic location  
697 were used (19 total). Sigmoid curves were fitted to time series data using the following formula:

$$698 \quad y = ae^{-be^{-ct}}$$

699 Where t is time and a, b and c are parameters that determine the shape and plateau of the curve. For the  
700 decay of wild-type sequence over time, the ratio was fitted as 1-y. Fitting was done using the *nls* package  
701 in R. Starting values 20, 10 and 0.1 were used for fitting of the parameters a, b and c, respectively.

702

#### 703 *Data availability*

704 Processed data is available at <https://osf.io/cywxd/>.

705 **Supplementary Table 1, Related to Methods**

706 Epigenome ChIP datasets used in this study.

| chip_source          | chip_target | chip_id                   | sra_chip                  | sra_input                                                              | PMID     |
|----------------------|-------------|---------------------------|---------------------------|------------------------------------------------------------------------|----------|
| <b>Bernstein2011</b> | H2AFZ       | GSM733786                 | SRR227661,<br>SRR227662   | SRR227650,<br>SRR5331211,<br>SRR5331212,<br>SRR5331213                 | 22955616 |
| <b>Bernstein2012</b> | EZH2        | GSM1003576                | SRR568431,<br>SRR568432   | SRR227650,<br>SRR5331211,<br>SRR5331212,<br>SRR5331213                 | 22955616 |
| <b>Bernstein2012</b> | H3K79me2    | GSM733653                 | SRR227378,<br>SRR227379   | SRR227650,<br>SRR5331211,<br>SRR5331212,<br>SRR5331213                 | 22955616 |
| <b>Minoda2018</b>    | H4K5acK8ac  | GSE113635                 | SRR7070730,<br>SRR7070731 | SRR7070732                                                             | 30503705 |
| <b>Salzberg2017</b>  | H3K9me2     | GSM1846169,<br>GSM2152591 | SRR2148301,<br>SRR3503783 | SRR2148307                                                             | 28301528 |
| <b>Schmidl2015</b>   | CTCF        | GSM1782717,<br>GSM1782718 | SRR2085871,<br>SRR2085872 | SRR2085882,<br>SRR2085883,<br>SRR2085884,<br>SRR2085885,<br>SRR2085886 | 26280331 |
| <b>Schmidl2015</b>   | H3K27ac     | GSM1782721,<br>GSM1782722 | SRR2085875,<br>SRR2085876 | SRR2085882,<br>SRR2085883,<br>SRR2085884,<br>SRR2085885,<br>SRR2085886 | 26280331 |
| <b>Schmidl2015</b>   | H3K27me3    | GSM1782749,<br>GSM1782750 | SRR2085903,<br>SRR2085904 | SRR2085882,<br>SRR2085883,<br>SRR2085884,<br>SRR2085885,<br>SRR2085886 | 26280331 |
| <b>Schmidl2015</b>   | H3K36me3    | GSM1782723,<br>GSM1782724 | SRR2085877,<br>SRR2085878 | SRR2085882,<br>SRR2085883,<br>SRR2085884,<br>SRR2085885,<br>SRR2085886 | 26280331 |
| <b>Shah2018</b>      | H3K4me1     | GSM2773392                | SRR6010166                | SRR6010181                                                             | 30244833 |
| <b>Shah2018</b>      | H3K4me1     | GSM2773394                | SRR6010168                | SRR6010181                                                             | 30244833 |
| <b>Shah2018</b>      | H3K4me1     | GSM2773396                | SRR6010170                | SRR6010181                                                             | 30244833 |
| <b>Shah2018</b>      | H3K4me2     | GSM2773399                | SRR6010173                | SRR6010181                                                             | 30244833 |
| <b>Shah2018</b>      | H3K4me2     | GSM2773400                | SRR6010174                | SRR6010181                                                             | 30244833 |
| <b>Shah2018</b>      | H3K4me3     | GSM2773401                | SRR6010175                | SRR6010181                                                             | 30244833 |
| <b>Shah2018</b>      | H3K4me3     | GSM2773403                | SRR6010177                | SRR6010181                                                             | 30244833 |
| <b>Shah2018</b>      | H3K4me3     | GSM2773404                | SRR6010178                | SRR6010181                                                             | 30244833 |

|                   |         |            |                           |                           |          |
|-------------------|---------|------------|---------------------------|---------------------------|----------|
| <b>Shah2018</b>   | H3K4me3 | GSM2773406 | SRR6010180                | SRR6010181                | 30244833 |
| <b>Snyder2012</b> | POL2AS2 | GSM935402  | SRR502194,<br>SRR502195   | SRR502641                 | 22955616 |
| <b>Snyder2012</b> | SMC3    | GSM935310  | SRR502001,<br>SRR502002   | SRR502641                 | 22955616 |
| <b>Snyder2016</b> | POL2    | GSE91721   | SRR5111542,<br>SRR5111543 | SRR5111209,<br>SRR5111210 | 22955616 |
| <b>Snyder2017</b> | HDAC1   | GSE105837  | SRR6213961,<br>SRR6213962 | SRR5111209,<br>SRR5111210 | 22955616 |
| <b>Snyder2017</b> | HDAC2   | GSE91451   | SRR5111049,<br>SRR5111050 | SRR5111209,<br>SRR5111210 | 22955616 |
| <b>Snyder2018</b> | HDAC3   | GSE127356  | SRR8659957,<br>SRR8659958 | SRR5111896,<br>SRR5111897 | 22955616 |

707  
708  
709

### Supplementary Table 2, Related to Methods

| Data type                 | Source ID                                                      | PMID                      |
|---------------------------|----------------------------------------------------------------|---------------------------|
| <b>DNAse</b>              | ENCF413AHU, ENCF936BDN                                         | 22955616                  |
| <b>Dam accessibility</b>  | 4DNESTAJJM3X                                                   | 30982597                  |
| <b>LMNB1 DamID</b>        | 4DNESTAJJM3X                                                   | 30982597                  |
| <b>Replication timing</b> | 4DNFIBIZK6EY,<br>4DNFIRKXCUW,<br>4DNFI5TMO13R,<br>4DNFIUCL6QG2 | ### No publication yet### |
| <b>TT-seq</b>             | <i>Bigwig tracks provided by authors</i>                       | 27257258                  |
| <b>5mC</b>                | ENCF872YSC, ENCF669KCI                                         | 22955616                  |

710  
711  
712

### Supplementary Table 3, Related to Methods

| Name            | Sequence (5' → 3')    | Target location (GRCh38)                      |
|-----------------|-----------------------|-----------------------------------------------|
| <b>LBR1</b>     | GAAATTTGCCGATGGTGAAG  | chr1 - 225,424,045-225,424,064<br>LBR exon 1  |
| <b>LBR2</b>     | GCCGATGGTGAAGTGGTAAG  | chr1 - 225,424,038-225,424,057<br>LBR exon 1  |
| <b>LBR12</b>    | GTGAAGTGGTAAGAGGTCGA  | chr1 - 225,424,031-225,424,050<br>LBR exon 1  |
| <b>LBR15</b>    | TCATAATAAAGTGA ACTCCC | chr1 - 225,424,031-225,424,050<br>LBR exon 1  |
| <b>LMNA_KO1</b> | ACTGAGAGCAGTGCTCAGTG  | chr1 - 156,130,700-156,130,719<br>LMNA exon 2 |
| <b>LMNA_KO2</b> | TCTCAGTGAGAAGCGCACGC  | chr1 + 156,130,713-156,130,732<br>LMNA exon 2 |



---

|                 |                      |                                               |
|-----------------|----------------------|-----------------------------------------------|
| <b>LMNA_KO4</b> | GGCGAGCTGCATGATCTGCG | chr1 + 156,130,738-156,130,757<br>LMNA exon 2 |
| <b>LBR_KO1</b>  | AGGCCGACATTAAGGAAGCA | chr1 - 225,422,116-225,422,135<br>LBR exon 2  |

---

713  
714  
715  
716  
717  
718  
719  
720  
721  
722  
723  
724  
725  
726  
727

728 **Supplementary Table 4, Related to Methods**

729

| Name                     | Number       | Sequence (5' -> 3')                                                                                           |
|--------------------------|--------------|---------------------------------------------------------------------------------------------------------------|
| <b>IPR-PB oligo-fw</b>   | ODS0001      | ACAAC TAGAATGCTAGCGTGACTGGAGTTCAGACGTGTGC<br>TCTTCCGATCTAATTTCTACTTCATAATAAAGTGAAC TCC<br>AGGCCATCGACCTCTTACC |
| <b>IPR-PB oligo-rv</b>   | ODS0002      | TGATCGGTACCAACTCCAGCAGGACCATGTGATCGAAAAT<br>GCCAAGTAGGAAATTTGCCGATGGTGAAGTGGTAAGAGG<br>TCGATGGCCTGGGAG        |
| <b>PB_NheI_constr_fw</b> | TAC0001      | ACAAC TAGAATGCTAGCGTG                                                                                         |
| <b>PB_KpnI_constr_rv</b> | TAC0002      | TGATCGGTACCAACTCCAG                                                                                           |
| <b>barcode primer-fw</b> | TAC0003      | ACTGATCATGGGTACCGATCA(N)16TTGTGGCCGGCCCTTG<br>TGACCTGCA                                                       |
| <b>barcode primer-rv</b> | TAC0004      | AAAAGCGCGCATACTAGATTAACCCTAGAAAGATAATCA<br>TATTG                                                              |
| <b>LBR12_oligo_fw</b>    | ODS0011      | CACCGGTGAAGTGGTAAGAGGTCTGA                                                                                    |
| <b>LBR12_oligo_rv</b>    | ODS0012      | AAACTCGACCTCTTACC ACTTCACC                                                                                    |
| <b>LBR15_oligo_fw</b>    | ODS0017      | CACCGTCATAATAAAGTGAAC TCC                                                                                     |
| <b>LBR15_oligo_rv</b>    | ODS0018      | AAACGGGAGTTCAC TTTATTATGAC                                                                                    |
| <b>LBR21_oligo_fw</b>    | ODS0029      | CACCGAGGCCGACATTAAGGAAGCA                                                                                     |
| <b>LBR21_oligo_rv</b>    | ODS0030      | AAACTGCTTCCTTAATGTCCGGCTC                                                                                     |
| <b>LMNAKO1_oligo_fw</b>  | ODS0033      | CACCGACTGAGAGCAGTGCTCAGTG                                                                                     |
| <b>LMNAKO1_oligo_rv</b>  | ODS0034      | AAACCACTGAGCACTGCTCTCAGTC                                                                                     |
| <b>LMNAKO2_oligo_f</b>   | ODS0035      | CACCGTCTCAGTGAGAAGCGCACGC                                                                                     |
| <b>LMNAKO2_oligo_rv</b>  | ODS0036      | AAACGCGTGCGCTTCTCACTGAGAC                                                                                     |
| <b>LMNAKO4_oligo_fw</b>  | ODS0039      | CACCGGGCGAGCTGCATGATCTGCG                                                                                     |
| <b>LMNAKO5_oligo_rv</b>  | ODS0040      | AAACCGCAGATCATGCAGCTCGCCC                                                                                     |
| <b>LBRKO_TIDE_fw</b>     | TAC0179      | ACATAAAGCGGAAGACAAAAGGC                                                                                       |
| <b>LBRKO_TIDE_rv</b>     | TAC0180      | TGCATTTGTCTCATGAAAGATGGAT                                                                                     |
| <b>LMNAKO_TIDE_fw</b>    | TAC0177      | AGGATGCCCTCTCCTGGTAA                                                                                          |
| <b>LMNAKO_TIDE_rv</b>    | TAC0178      | CTGTGGTAGATCCCATTGGC                                                                                          |
| <b>indelPCR1-fw-BC</b>   | TAC0007.1-24 | ACACTCTTTCCCTACACGACGCTCTTCCGATCT(N)10GTCA<br>CAAGGGCCGGCCACA                                                 |
| <b>indelPCR1-rv</b>      | TAC0012      | GTGACTGGAGTTCAGACGTGTGCTCTTCCGATCT                                                                            |
| <b>indelPCR2-fw</b>      | TAC0009      | AATGATACGGCGACCACCGAGATCTACACTCTTTCCCTAC<br>ACGACGCTCTTCCGATCT                                                |
| <b>indelPCR2-rv</b>      | TAC0011      | CAAGCAGAAGACGGCATAACGAGATGTGACTGGAGTTCAG<br>ACGTGTGCTCTTCCGATCT                                               |
| <b>indelPCR2-rv-BC</b>   | TAC0159.1-96 | CAAGCAGAAGACGGCATAACGAGAT(N)6GTGACTGGAGTT<br>CAGACGTGTGCTCTTCCGATCT                                           |

730

731

732

733 **FIGURE LEGENDS**

734

735

736 **Figure 1: Principle of multiplexed DSB repair pathway reporter assay.**

737 **(A)** Left panel: sequences of the most common insertions and deletions produced after break and repair  
738 with induced with LBR2 sgRNA. Inserted nucleotide in red, microhomologies are underlined. Right panel:  
739 indel frequency distribution after cutting the *LBR* gene. Negative indel sizes refer to deletions, positive sizes  
740 refer to insertions. The +1 and -7 indels are marked in red and blue, respectively. **(B)** Schematic of the TRIP  
741 construct. ITR, inverted terminal repeat of PiggyBac transposable element; the LBR gene-derived sequence  
742 fragment is shown in light green, with the sgRNA target sequence in dark green. PCR primers are indicated  
743 by the arrows (F and R). **(C)** Schematic of the TRIP experimental setup. See main text.

744

745 **Figure 2: Multiplexed detection of DSB repair pathway usage.**

746 **(A)** Genomic integration coordinates of 1229 uniquely mapped IPRs (both cell pools combined) that passed  
747 filtering as described in the methods and are used in this work. **(B)** Indel frequency distributions of six  
748 randomly selected IPRs, 64 hours after Cas9 induction. Data are average of 6 independent replicates. Error  
749 bars are  $\pm$  SD. Gray: wild-type sequence, red: +1 insertion, diagnostic of NHEJ, blue: = -7 deletion,  
750 diagnostic of MMEJ, black: other indels. **(C)** Indel frequencies of all IPRs shown in **A**, 64 hours after Cas9  
751 induction. Data are average of 2-6 independent replicates.

752

753 **Figure 3: IPR total indel frequency varies as a function of chromatin context.**

754 **(A)** Schematic of the IPR with four different gRNA target sites indicated by the arrow heads. The arrow  
755 heads point toward their PAM site. **(B)** Total indel frequency distributions of IPRs after targeting by four  
756 different sgRNAs. For each sgRNA, IPRs were only included if they yielded reliable data in at least two  
757 independent experiments (LBR2: 1010 IPRs [n = 2-8]; LBR1: 956 IPRs [n = 2]; LBR12: 942 IPRs [n =  
758 2]; LBR15: 932 IPRs [n = 2]). **(C)** Scatter plots of total indel frequencies obtained with LBR2 versus the  
759 three other sgRNAs. rho is Spearman's rank correlation coefficient. **(D)** Pearson's correlations between  
760 total indel frequencies in IPRs and the local intensities of 24 chromatin features at the IPR integration  
761 sites, for four different sgRNAs. Only statistically significant correlation values ( $p < 0.001$ ) are shown.  
762 Chromatin features are ordered by the LBR2 correlation coefficients. **(E)** Total indel frequency at each  
763 IPR obtained with LBR2 sgRNA, split into different combinations of heterochromatin features present, as  
764 indicated by black dots in the scheme below the graph. Boxed numbers indicate the number of IPRs in  
765 each group; only groups with >20 IPRs are shown. Asterisks mark p-values according to the Wilcoxon  
766 test, compared to euchromatin IPRs (most left column): \*  $p < 0.05$ , \*\*  $p < 0.01$ , \*\*\*  $p < 0.001$ , \*\*\*\*  $p <$

767 0.0001. (F) Same as E, but boxplots for the other three sgRNAs. The boxes represent 75% confidence  
768 interval, the horizontal line within represents the median, the error bars represent and 95% confidence  
769 intervals.

770

771 **Figure 4: Different balance of NHEJ and MMEJ in LADs compared to inter-LADs.**

772 (A) Variation in indel composition across IPRs. Red: +1 (NHEJ); blue: -7 (MMEJ); black: other indels  
773 (unknown pathway). IPRs are ordered by +1 insertion frequency (1171 IPRs, 2-8 independent  
774 experiments). (B) MMEJ:NHEJ balance distribution across all IPRs. (C) Pearson's correlation  
775 coefficients of the local intensities of 24 chromatin features versus the proportion of +1 (red), -7 (blue)  
776 and other indels (black). Correlations with  $p > 0.001$  not shown. (D) MMEJ:NHEJ balance per IPR, split  
777 into different combinations of heterochromatin features as indicated by black dots in the scheme below  
778 the graph. Boxed numbers indicate the number of IPRs in each group; only groups with  $>20$  IPRs are  
779 shown; see [Figure S4C](#) for all groups. Asterisks mark p-values according to the Wilcoxon test, compared  
780 to euchromatin IPRs (most left column): \*  $p < 0.05$ , \*\*  $p < 0.01$ , \*\*\*  $p < 0.001$ , \*\*\*\*  $p < 0.0001$ . (E)  
781 Correlation between total indel frequency and MMEJ:NHEJ balance across all IPRs. Rho, Spearman's  
782 rank correlation coefficient.

783

784 **Figure 5: Accumulation of indels over time.**

785 (A) Time curves of the +1 insertion (red) and -7 deletion (blue) in single IPRs located in three different  
786 types of chromatin. See [Figure S5](#) for plots of all 19 IPRs in clone 5. Dots are measured values; lines are  
787 fitted sigmoid curves. Triple heterochromatin is the combination of H3K9me2, lamina association and  
788 late replication; euchromatin is here defined as the absence of any heterochromatin features. (B) Shifting  
789 MMEJ:NHEJ balance over time in 19 IPRs of clone 5. Triple heterochromatin IPRs in purple, H3K27me3  
790 IPRs in magenta, euchromatin IPRs in orange and the other IPRs in gray. Data in A-B are averages of two  
791 independent experiments.

792

793 **Figure 6: Effects of heterochromatin perturbations on pathway balance.**

794 (A) Log<sub>2</sub> fold-change of MMEJ:NHEJ balance in GSK126 treated cells compared to control cells, for 917  
795 IPRs divided by heterochromatin type. Data are average of two independent biological replicates.  
796 Wilcoxon test compared to euchromatin IPRs (most left column), \*  $p < 0.05$ , \*\*  $p < 0.01$ , \*\*\*  $p < 0.001$ ,  
797 \*\*\*\*  $p < 0.0001$ . (B, D) Nuclear lamina interaction tracks around IPR2 (B) and IPR17 (D). The tracks for  
798 the KO clones are average of 4 separate clones (individual tracks are shown in [Figure S7B](#)). All data are  
799 average of two independent biological replicates. (C, E) Comparison of MMEJ:NHEJ balance ( $n = 3$ ) and

800 average lamina interaction score in a 20 kb window centered on the IPR (n = 2), for IPR2 (C) and IPR17  
801 (E).

802

803 **Figure 7: Balance between NHEJ, MMEJ and SSTR in different chromatin contexts.**

804 (A) Average pathway contribution across all IPRs in the cell pools, in the absence or presence of a  
805 ssODN donor, and with or without NU7441 treatment (n = 2-8). Red: +1 insertion (NHEJ); blue: -7

806 deletion (MMEJ); green: +2 insertion due to SSTR; black: other indels. (B) Pearson's correlations of the  
807 local intensities of 24 chromatin features versus the relative activity of each pathway (n = 2-3).

808 Correlations with  $p > 0.001$  not shown. Colors as in A. (C) Proportion of DSBs repaired by SSTR in the  
809 presence of the ssODN donor, for each IPR, split according to the heterochromatin features present as

810 indicated by black dots in the scheme below the graph. Boxed numbers indicate the number of IPRs in  
811 each group; only groups with  $>20$  IPRs are shown; see [Figure S8I](#) for all groups. Asterisks mark p-values

812 according to the Wilcoxon test, compared to euchromatin IPRs (most left column): \*  $p < 0.05$ , \*\*  $p <$   
813  $0.01$ , \*\*\*  $p < 0.001$ , \*\*\*\*  $p < 0.0001$ . (D) Same as in C, but showing the MMEJ:SSTR balance. See also

814 [Figure S8J](#). (E) Time curves as in Figure 5A, but now in the presence of the ssODN donor and NU7441  
815 (n = 2). Colors as in A. Dots are measured values; lines are fitted sigmoid curves. See [Figure S9](#) for plots

816 of all 19 IPRs in clone 5. (F) Gradual increase of the MMEJ:SSTR balance over time in 19 IPRs of clone  
817 5. Triple heterochromatin IPRs in purple, H3K27me3 IPRs in magenta, euchromatin IPRs in orange and  
818 the other IPRs in gray.

819

820

821 **SUPPLEMENTARY FIGURE LEGENDS**

822

823 **Supplementary Figure S1: genomic location, chromatin context and indel frequencies of IPRs**

824 (A) Genomic locations of the mapped IPRs in each of the two cell pools (Pools A and B) and in clone 5.  
825 Red: uniquely mapped IPRs with indel data that passed the quality criteria (also shown in [Figure 2A](#));  
826 black: uniquely mapped IPRs that did not pass the indel quality criteria. (see Methods) (B) Heatmap of  
827 chromatin features at each IPR integration site in clone 5. Levels of chromatin features are represented as  
828 z-scores (see Methods). IPRs are clustered based on similarities of the z-scores. (C) Median indel  
829 frequencies across all IPRs; same data as Figure 2B but plotted over a wider range of indel sizes to illustrate  
830 that large indels are rare compared to -7 and +1. (D) Frequencies of all indel sizes as in [Figure 2C](#) but split  
831 on each pool. Data for 539 (pool A) and 690 (pool B) IPRs. Data are average of 2-6 independent replicates.

832

833 **Supplementary Figure S2. Characterization of pathways that generate reporter indels.**

834 (A-C) Effects of chemical inhibition of DNAPKcs on indel frequencies. (A) Frequency of +1 and -7 indels  
835 for all IPRs in the cell pools treated with the DNAPKcs inhibitor NU7441 (gray, mean of n = 5) or with  
836 DMSO control (black, mean of n = 6). (B) Same data as in A, but now shown as median indel frequencies  
837 of all IPRs, for each replicate experiment. (C) Frequency of +1 and -7 indels for all IPRs in the cell pools  
838 treated with the DNAPKcs inhibitor M3814 (gray, mean of n = 2) or with DMSO control (black, n = 2).  
839 (D-E) Effect of knockdown of various DSB repair proteins on indel frequencies. (D) Log<sub>2</sub> fold-change in  
840 the frequencies of the -7, +1 and ssODN-induced +2 indels at all 19 IPRs in clone 5, after siRNA-mediated  
841 knockdown of the indicated proteins compared to a control siRNA (n = 2). (E) Relative activity of each  
842 pathway for all 19 barcodes in clone 5 combined, after indicated siRNA treatments. Red: +1 insertion  
843 (NHEJ); blue: -7 deletion (MMEJ); green: +2 insertion due to SSTR; black: other indels. Right-hand panel  
844 shows data from cells treated with NU7441 (1 μM), left-hand panel shows data from control cells. Asterisks  
845 in panels A-D denote adjusted p-values: \* p < 0.05; \*\* p < 0.01; \*\*\* p < 0.001; \*\*\*\* p < 0.0001.

846

847 **Supplementary Figure S3: IPRs generally adopt the chromatin state of their integration site.**

848 (A) Horizontal axes: log<sub>2</sub> normalized signal of the indicated histone modifications in a window of 2kb  
849 centered on the IPR integration site (n = 2), according to public ChIP-seq data from K562 cells (see [Table](#)  
850 [S1](#)). Vertical axes: log<sub>2</sub> normalized barcode reads of 19 IPRs in clone 5 after ChIP of the indicated histone  
851 modifications, followed by PCR amplification of the barcodes and Illumina sequencing. Data are average  
852 of two independent replicates. Solid lines and shading show linear regression fits with 95% confidence  
853 intervals. Rho is Spearman's rank correlation coefficient.

854

855 **Supplementary Figure S4: Correlations between pathway usage and chromatin features**

856 (A) Scatterplots of the relative indel frequencies in the IPR cell pools versus local log<sub>2</sub> H3K4me1 ChIP-  
857 seq signal (top row) or log<sub>2</sub> Lamin B1 DamID signal (bottom row) at the IPR integration sites. Rho is  
858 Pearson's correlation coefficient; solid lines and shading show linear regression fits with 95% confidence  
859 intervals. (B) Density plots of the MMEJ:NHEJ balance for each pool separately. (B) Same as **Figure 4D**,  
860 but now including heterochromatin types with 20 or fewer IPRs.

861

862 **Supplementary Figure S5: Time series of -7 and +1 indel accumulation for all IPRs in clone 5.**

863 Time curves of the +1 insertion (red) and -7 deletion (blue) for all 19 individual IPRs. See legend Figure  
864 5A. Triple heterochromatin is the combination of late replicating, LAD and H3K9me2.

865

866 **Supplementary Figure S6: Inhibitor and knockdown validations.**

867 (A) Log<sub>2</sub> fold-change of MMEJ:NHEJ balance in BIX01294 treated cells (n = 2) compared to non-treated  
868 cells for 1029 IPRs divided by heterochromatin domains (n = 2-8). Wilcoxon test compared to non-  
869 heterochromatin IPRs (most left column), \* p < 0.05, \*\* p < 0.01, \*\*\* p < 0.001, \*\*\*\* p < 0.0001. (B)  
870 Western blot of H3K9me2 in clone 5 cells after treatment with either 1 μM GSK126 or 500 nM  
871 BIX01294. (C) Quantification of Western blots (mean of two independent replicates, error bars show  
872 S.D.), normalized to H3K9me2 levels in control cells and red ponceau staining for protein content. (D-E)  
873 Same as B and C but for H3K27me3. (F-G) Indel patterns inside the *LMNA* (E) and *LBR* (F) genes in  
874 respective knockout sub-clones that were derived from clone 5, showing frameshifts (i.e., indel sizes that  
875 are not multiples of three) in all alleles. Note that chromosomes in K562 cells can be tri- or tetraploid.  
876 Indel spectra were obtained by TIDE (Brinkman et al., 2014). (H) DAPI and immunostaining of LMNB1  
877 and LMNA in wild-type clone 5 cells and in the four independent LMNA knockout cell lines. (I)  
878 Immunostaining of LMNB1 (red) and LBR (red) in wild-type clone 5 (WT) cells and in the four  
879 independent LBR knockout cell lines. Scale bar in G-H is 20 μm.

880

881 **Supplementary Figure S7: LMNA and LBR knockout in clone 5.**

882 (D) Scatterplot of MMEJ:NHEJ balance compared to LMNB1 pA-DamID z-score for each IPR, 10kb up  
883 and downstream of the IPR. Black circle is clone5, green triangles are the LBR KO clones and yellow  
884 squares are LMNA KO clones. (A) Z-score of pA-DamID tracks for LMNB1 centered on IPR17 with  
885 2Mb up and downstream. (n = 2) (C) Same as in B but for IPR2.

886

887 **Supplementary Figure S8: Chromatin context effects on the SSTR pathway.**

888 (A) Schematic of the strategy to probe SSTR simultaneously with NHEJ and MMEJ. Prior to Cas9  
889 activation, the ssODN is co-transfected with a plasmid that encodes the LBR2 sgRNA. The ssODN (black  
890 bar) covers the reporter sequence but not the barcode, and contains a 2 bp insertion (green) at the PAM.  
891 (B) Indel frequencies generated by NHEJ, MMEJ and SSTR in 965 IPRs in the two cell pools, 64 hours  
892 after Cas9 activation (average of two replicate experiments).  $N = 2-3$  (C-D) Comparison of +1 (NHEJ;  
893 panel C) and -7 (MMEJ, panel D) indel frequencies in all IPRs in cell pools in the presence (+) or absence  
894 (-) of the ssODN. Black line: diagonal. (E) Comparison of MMEJ and SSTR frequencies across all IPRs  
895 in cell pools treated with the ssODN. (F) Same as (E) but in the presence of NU7441. (G-H) Scatterplots  
896 of the relative indel frequencies (proportion of all indels) versus (G)  $\log_2$  H3K4me1 ChIP-seq signal and  
897 (H)  $\log_2$  replication timing (positive values: late, negative values: early).  $R$  in panels C-G are Pearson's  
898 correlation coefficients; blue lines with shading are linear regression fits with 95% confidence interval. (I-  
899 J) Same as Figures 7C-D, but now including heterochromatin types with 20 or fewer IPRs.

900

901 **Supplementary Figure S9: Time series of indel accumulation, including SSTR.**

902 Time curves as in [Figure 7E](#), but now for all 19 individual IPRs in clone 5 in the presence of ssODN to  
903 probe SSTR. Cells were treated with NU7441 to reduce the contribution of NHEJ. See legend [Figure 7E](#)  
904 for details. Triple heterochromatin is the combination of late replicating, LAD and H3K9me2.

905

906

907

908



## 909 REFERENCES

910

911 Akhtar, W., de Jong, J., Pindyurin, A.V., Pagie, L., Meuleman, W., de Ridder, J., Berns, A., Wessels, L.F.,  
912 van Lohuizen, M., and van Steensel, B. (2013). Chromatin position effects assayed by thousands of  
913 reporters integrated in parallel. *Cell* 154, 914-927.

914 Akhtar, W., Pindyurin, A.V., de Jong, J., Pagie, L., Ten Hoeve, J., Berns, A., Wessels, L.F., van Steensel,  
915 B., and van Lohuizen, M. (2014). Using TRIP for genome-wide position effect analysis in cultured cells.  
916 *Nat Protoc* 9, 1255-1281.

917 Alagoz, M., Katsuki, Y., Ogiwara, H., Ogi, T., Shibata, A., Kakarougkas, A., and Jeggo, P. (2015).  
918 SETDB1, HP1 and SUV39 promote repositioning of 53BP1 to extend resection during homologous  
919 recombination in G2 cells. *Nucleic Acids Res* 43, 7931-7944.

920 Allen, F., Crepaldi, L., Alsinet, C., Strong, A.J., Kleshchevnikov, V., De Angeli, P., Palenikova, P.,  
921 Khodak, A., Kiselev, V., Kosicki, M., *et al.* (2018). Predicting the mutations generated by repair of Cas9-  
922 induced double-strand breaks. *Nat Biotechnol.*

923 Aymard, F., Bugler, B., Schmidt, C.K., Guillou, E., Caron, P., Briois, S., Iacovoni, J.S., Daburon, V., Miller,  
924 K.M., Jackson, S.P., *et al.* (2014). Transcriptionally active chromatin recruits homologous recombination  
925 at DNA double-strand breaks. *Nat Struct Mol Biol* 21, 366-374.

926 Baldeyron, C., Soria, G., Roche, D., Cook, A.J., and Almouzni, G. (2011). HP1alpha recruitment to DNA  
927 damage by p150CAF-1 promotes homologous recombination repair. *J Cell Biol* 193, 81-95.

928 Banaszynski, L.A., Chen, L.C., Maynard-Smith, L.A., Ooi, A.G., and Wandless, T.J. (2006). A rapid,  
929 reversible, and tunable method to regulate protein function in living cells using synthetic small molecules.  
930 *Cell* 126, 995-1004.

931 Brinkman, E.K., Chen, T., Amendola, M., and van Steensel, B. (2014). Easy quantitative assessment of  
932 genome editing by sequence trace decomposition. *Nucleic Acids Res* 42, e168.

933 Brinkman, E.K., Chen, T., de Haas, M., Holland, H.A., Akhtar, W., and van Steensel, B. (2018). Kinetics  
934 and Fidelity of the Repair of Cas9-Induced Double-Strand DNA Breaks. *Mol Cell* 70, 801-813 e806.

935 Carvalho, S., Vitor, A.C., Sridhara, S.C., Martins, F.B., Raposo, A.C., Desterro, J.M., Ferreira, J., and de  
936 Almeida, S.F. (2014). SETD2 is required for DNA double-strand break repair and activation of the p53-  
937 mediated checkpoint. *Elife* 3, e02482.

938 Chakrabarti, A.M., Henser-Brownhill, T., Monserrat, J., Poetsch, A.R., Luscombe, N.M., and Scaffidi, P.  
939 (2019). Target-Specific Precision of CRISPR-Mediated Genome Editing. *Mol Cell* 73, 699-713 e696.

940 Chan, S.H., Yu, A.M., and McVey, M. (2010). Dual roles for DNA polymerase theta in alternative end-  
941 joining repair of double-strand breaks in *Drosophila*. *PLoS Genet* 6, e1001005.

942 Chang, H.H.Y., Pannunzio, N.R., Adachi, N., and Lieber, M.R. (2017). Non-homologous DNA end joining  
943 and alternative pathways to double-strand break repair. *Nat Rev Mol Cell Biol* 18, 495-506.

944 Chapman, J.R., Taylor, M.R., and Boulton, S.J. (2012). Playing the end game: DNA double-strand break  
945 repair pathway choice. *Mol Cell* 47, 497-510.

946 Chen, W., McKenna, A., Schreiber, J., Haeussler, M., Yin, Y., Agarwal, V., Noble, W.S., and Shendure, J.  
947 (2019). Massively parallel profiling and predictive modeling of the outcomes of CRISPR/Cas9-mediated  
948 double-strand break repair. *Nucleic Acids Res* 47, 7989-8003.

- 949 Chen, X., Rinsma, M., Janssen, J.M., Liu, J., Maggio, I., and Goncalves, M.A. (2016). Probing the impact  
950 of chromatin conformation on genome editing tools. *Nucleic Acids Res* 44, 6482-6492.
- 951 Chen, Y., Zhang, Y., Wang, Y., Zhang, L., Brinkman, E.K., Adam, S.A., Goldman, R., van Steensel, B.,  
952 Ma, J., and Belmont, A.S. (2018). Mapping 3D genome organization relative to nuclear compartments  
953 using TSA-Seq as a cytological ruler. *J Cell Biol* 217, 4025-4048.
- 954 Chiolo, I., Minoda, A., Colmenares, S.U., Polyzos, A., Costes, S.V., and Karpen, G.H. (2011). Double-  
955 strand breaks in heterochromatin move outside of a dynamic HP1a domain to complete recombinational  
956 repair. *Cell* 144, 732-744.
- 957 Clouaire, T., and Legube, G. (2015). DNA double strand break repair pathway choice: a chromatin based  
958 decision? *Nucleus* 6, 107-113.
- 959 Clouaire, T., and Legube, G. (2019). A Snapshot on the Cis Chromatin Response to DNA Double-Strand  
960 Breaks. *Trends Genet* 35, 330-345.
- 961 Clouaire, T., Rocher, V., Lashgari, A., Arnould, C., Aguirrebengoa, M., Biernacka, A., Skrzypczak, M.,  
962 Aymard, F., Fongang, B., Dojer, N., *et al.* (2018). Comprehensive Mapping of Histone Modifications at  
963 DNA Double-Strand Breaks Deciphers Repair Pathway Chromatin Signatures. *Mol Cell* 72, 250-262  
964 e256.
- 965 Clowney, E.J., LeGros, M.A., Mosley, C.P., Clowney, F.G., Markenskoff-Papadimitriou, E.C., Myllys, M.,  
966 Barnea, G., Larabell, C.A., and Lomvardas, S. (2012). Nuclear aggregation of olfactory receptor genes  
967 governs their monogenic expression. *Cell* 151, 724-737.
- 968 Corrales, M., Rosado, A., Cortini, R., van Arensbergen, J., van Steensel, B., and Filion, G.J. (2017).  
969 Clustering of *Drosophila* housekeeping promoters facilitates their expression. *Genome Res* 27, 1153-  
970 1161.
- 971 Daer, R.M., Cutts, J.P., Brafman, D.A., and Haynes, K.A. (2017). The Impact of Chromatin Dynamics on  
972 Cas9-Mediated Genome Editing in Human Cells. *ACS Synth Biol* 6, 428-438.
- 973 Daugaard, M., Baude, A., Fugger, K., Povlsen, L.K., Beck, H., Sorensen, C.S., Petersen, N.H., Sorensen,  
974 P.H., Lukas, C., Bartek, J., *et al.* (2012). LEDGF (p75) promotes DNA-end resection and homologous  
975 recombination. *Nat Struct Mol Biol* 19, 803-810.
- 976 Deng, S.K., Gibb, B., de Almeida, M.J., Greene, E.C., and Symington, L.S. (2014). RPA antagonizes  
977 microhomology-mediated repair of DNA double-strand breaks. *Nat Struct Mol Biol* 21, 405-412.
- 978 DeWitt, M.A., Magis, W., Bray, N.L., Wang, T., Berman, J.R., Urbinati, F., Heo, S.J., Mitros, T., Munoz,  
979 D.P., Boffelli, D., *et al.* (2016). Selection-free genome editing of the sickle mutation in human adult  
980 hematopoietic stem/progenitor cells. *Sci Transl Med* 8, 360ra134.
- 981 Encode Project Consortium (2012). An integrated encyclopedia of DNA elements in the human genome.  
982 *Nature* 489, 57-74.
- 983 Gasperini, M., Tome, J.M., and Shendure, J. (2020). Towards a comprehensive catalogue of validated  
984 and target-linked human enhancers. *Nat Rev Genet*.
- 985 Gisler, S., Goncalves, J.P., Akhtar, W., de Jong, J., Pindyurin, A.V., Wessels, L.F.A., and van Lohuizen,  
986 M. (2019). Multiplexed Cas9 targeting reveals genomic location effects and gRNA-based staggered  
987 breaks influencing mutation efficiency. *Nat Commun* 10, 1598.

- 988 Goodarzi, A.A., Noon, A.T., Deckbar, D., Ziv, Y., Shiloh, Y., Lobrich, M., and Jeggo, P.A. (2008). ATM  
989 signaling facilitates repair of DNA double-strand breaks associated with heterochromatin. *Mol Cell* *31*,  
990 167-177.
- 991 Gottlieb, T.M., and Jackson, S.P. (1993). The DNA-dependent protein kinase: requirement for DNA ends  
992 and association with Ku antigen. *Cell* *72*, 131-142.
- 993 Hendel, A., Kildebeck, E.J., Fine, E.J., Clark, J., Punjya, N., Sebastiano, V., Bao, G., and Porteus, M.H.  
994 (2014). Quantifying genome-editing outcomes at endogenous loci with SMRT sequencing. *Cell Rep* *7*,  
995 293-305.
- 996 Hustedt, N., and Durocher, D. (2016). The control of DNA repair by the cell cycle. *Nat Cell Biol* *19*, 1-9.
- 997 Iliakis, G., Murmann, T., and Soni, A. (2015). Alternative end-joining repair pathways are the ultimate  
998 backup for abrogated classical non-homologous end-joining and homologous recombination repair:  
999 Implications for the formation of chromosome translocations. *Mutat Res Genet Toxicol Environ Mutagen*  
1000 *793*, 166-175.
- 1001 Jakob, B., Splinter, J., Conrad, S., Voss, K.O., Zink, D., Durante, M., Lobrich, M., and Taucher-Scholz, G.  
1002 (2011). DNA double-strand breaks in heterochromatin elicit fast repair protein recruitment, histone H2AX  
1003 phosphorylation and relocation to euchromatin. *Nucleic Acids Res* *39*, 6489-6499.
- 1004 Janssen, A., Breuer, G.A., Brinkman, E.K., van der Meulen, A.I., Borden, S.V., van Steensel, B., Bindra,  
1005 R.S., LaRocque, J.R., and Karpen, G.H. (2016). A single double-strand break system reveals repair  
1006 dynamics and mechanisms in heterochromatin and euchromatin. *Genes Dev* *30*, 1645-1657.
- 1007 Jasin, M., and Haber, J.E. (2016). The democratization of gene editing: Insights from site-specific  
1008 cleavage and double-strand break repair. *DNA Repair (Amst)* *44*, 6-16.
- 1009 Jeggo, P.A., and Downs, J.A. (2014). Roles of chromatin remodellers in DNA double strand break repair.  
1010 *Exp Cell Res* *329*, 69-77.
- 1011 Jensen, K.T., Floe, L., Petersen, T.S., Huang, J., Xu, F., Bolund, L., Luo, Y., and Lin, L. (2017).  
1012 Chromatin accessibility and guide sequence secondary structure affect CRISPR-Cas9 gene editing  
1013 efficiency. *FEBS Lett* *591*, 1892-1901.
- 1014 Kallimasioti-Pazi, E.M., Thelakkad Chathoth, K., Taylor, G.C., Meynert, A., Ballinger, T., Kelder, M.J.E.,  
1015 Lavee, S., Sanli, I., Feil, R., and Wood, A.J. (2018). Heterochromatin delays CRISPR-Cas9  
1016 mutagenesis but does not influence the outcome of mutagenic DNA repair. *PLoS Biol* *16*, e2005595.
- 1017 Kalousi, A., and Soutoglou, E. (2016). Nuclear compartmentalization of DNA repair. *Curr Opin Genet Dev*  
1018 *37*, 148-157.
- 1019 Lee, Y.H., Kuo, C.Y., Stark, J.M., Shih, H.M., and Ann, D.K. (2013). HP1 promotes tumor suppressor  
1020 BRCA1 functions during the DNA damage response. *Nucleic Acids Res* *41*, 5784-5798.
- 1021 Leemans, C., van der Zwalm, M.C.H., Brueckner, L., Comoglio, F., van Schaik, T., Pagie, L., van  
1022 Arensbergen, J., and van Steensel, B. (2019). Promoter-Intrinsic and Local Chromatin Features  
1023 Determine Gene Repression in LADs. *Cell* *177*, 852-864 e814.
- 1024 Lemaitre, C., Grabarz, A., Tsuroula, K., Andronov, L., Furst, A., Pankotai, T., Heyer, V., Rogier, M.,  
1025 Attwood, K.M., Kessler, P., *et al.* (2014). Nuclear position dictates DNA repair pathway choice. *Genes*  
1026 *Dev* *28*, 2450-2463.

- 1027 Lin, S., Staahl, B.T., Alla, R.K., and Doudna, J.A. (2014). Enhanced homology-directed human genome  
1028 engineering by controlled timing of CRISPR/Cas9 delivery. *Elife* 3, e04766.
- 1029 Mateos-Gomez, P.A., Gong, F., Nair, N., Miller, K.M., Lazzerini-Denchi, E., and Sfeir, A. (2015).  
1030 Mammalian polymerase theta promotes alternative NHEJ and suppresses recombination. *Nature* 518,  
1031 254-257.
- 1032 McVey, M., and Lee, S.E. (2008). MMEJ repair of double-strand breaks (director's cut): deleted  
1033 sequences and alternative endings. *Trends Genet* 24, 529-538.
- 1034 Mitrentsi, I., Yilmaz, D., and Soutoglou, E. (2020). How to maintain the genome in nuclear space. *Curr*  
1035 *Opin Cell Biol* 64, 58-66.
- 1036 Mladenov, E., Magin, S., Soni, A., and Iliakis, G. (2016). DNA double-strand-break repair in higher  
1037 eukaryotes and its role in genomic instability and cancer: Cell cycle and proliferation-dependent  
1038 regulation. *Semin Cancer Biol* 37-38, 51-64.
- 1039 Montague, T.G., Cruz, J.M., Gagnon, J.A., Church, G.M., and Valen, E. (2014). CHOPCHOP: a  
1040 CRISPR/Cas9 and TALEN web tool for genome editing. *Nucleic Acids Res* 42, W401-407.
- 1041 Okamoto, S., Amaishi, Y., Maki, I., Enoki, T., and Mineno, J. (2019). Highly efficient genome editing for  
1042 single-base substitutions using optimized ssODNs with Cas9-RNPs. *Sci Rep* 9, 4811.
- 1043 Ott, C.J., Federation, A.J., Schwartz, L.S., Kasar, S., Klitgaard, J.L., Lenci, R., Li, Q., Lawlor, M.,  
1044 Fernandes, S.M., Souza, A., *et al.* (2018). Enhancer Architecture and Essential Core Regulatory Circuitry  
1045 of Chronic Lymphocytic Leukemia. *Cancer Cell* 34, 982-995 e987.
- 1046 Pfister, S.X., Ahrabi, S., Zalmas, L.P., Sarkar, S., Aymard, F., Bachrati, C.Z., Helleday, T., Legube, G., La  
1047 Thangue, N.B., Porter, A.C., *et al.* (2014). SETD2-dependent histone H3K36 trimethylation is required for  
1048 homologous recombination repair and genome stability. *Cell Rep* 7, 2006-2018.
- 1049 Pokusaeva, V.O., Diez, A.R., Espinar, L., and Filion, G.J. (2019). Strand asymmetry influences mismatch  
1050 repair during single-strand annealing. 847160.
- 1051 Redwood, A.B., Perkins, S.M., Vanderwaal, R.P., Feng, Z., Biehl, K.J., Gonzalez-Suarez, I., Morgado-  
1052 Palacin, L., Shi, W., Sage, J., Roti-Roti, J.L., *et al.* (2011). A dual role for A-type lamins in DNA double-  
1053 strand break repair. *Cell Cycle* 10, 2549-2560.
- 1054 Richardson, C.D., Kazane, K.R., Feng, S.J., Zelin, E., Bray, N.L., Schafer, A.J., Floor, S.N., and Corn,  
1055 J.E. (2018). CRISPR-Cas9 genome editing in human cells occurs via the Fanconi anemia pathway. *Nat*  
1056 *Genet* 50, 1132-1139.
- 1057 Richardson, C.D., Ray, G.J., DeWitt, M.A., Curie, G.L., and Corn, J.E. (2016). Enhancing homology-  
1058 directed genome editing by catalytically active and inactive CRISPR-Cas9 using asymmetric donor DNA.  
1059 *Nat Biotechnol* 34, 339-344.
- 1060 Riesenberger, S., Chintalapati, M., Macak, D., Kanis, P., Maricic, T., and Paabo, S. (2019). Simultaneous  
1061 precise editing of multiple genes in human cells. *Nucleic Acids Res* 47, e116.
- 1062 Ryu, T., Spatola, B., Delabaere, L., Bowlin, K., Hopp, H., Kunitake, R., Karpen, G.H., and Chiolo, I.  
1063 (2015). Heterochromatic breaks move to the nuclear periphery to continue recombinational repair. *Nat*  
1064 *Cell Biol* 17, 1401-1411.
- 1065 Sartori, A.A., Lukas, C., Coates, J., Mistrik, M., Fu, S., Bartek, J., Baer, R., Lukas, J., and Jackson, S.P.  
1066 (2007). Human CtIP promotes DNA end resection. *Nature* 450, 509-514.

- 1067 Schmidl, C., Rendeiro, A.F., Sheffield, N.C., and Bock, C. (2015). ChIPmentation: fast, robust, low-input  
1068 ChIP-seq for histones and transcription factors. *Nat Methods* 12, 963-965.
- 1069 Schmidt, D., Wilson, M.D., Spyrou, C., Brown, G.D., Hadfield, J., and Odom, D.T. (2009). ChIP-seq: using  
1070 high-throughput sequencing to discover protein-DNA interactions. *Methods* 48, 240-248.
- 1071 Schwalb, B., Michel, M., Zacher, B., Fruhauf, K., Demel, C., Tresch, A., Gagneur, J., and Cramer, P.  
1072 (2016). TT-seq maps the human transient transcriptome. *Science* 352, 1225-1228.
- 1073 Scully, R., Panday, A., Elango, R., and Willis, N.A. (2019). DNA double-strand break repair-pathway  
1074 choice in somatic mammalian cells. *Nat Rev Mol Cell Biol* 20, 698-714.
- 1075 Shah, R.N., Grzybowski, A.T., Cornett, E.M., Johnstone, A.L., Dickson, B.M., Boone, B.A., Cheek, M.A.,  
1076 Cowles, M.W., Maryanski, D., Meiners, M.J., *et al.* (2018). Examining the Roles of H3K4 Methylation  
1077 States with Systematically Characterized Antibodies. *Mol Cell* 72, 162-177 e167.
- 1078 Shen, M.W., Arbab, M., Hsu, J.Y., Worstell, D., Culbertson, S.J., Krabbe, O., Cassa, C.A., Liu, D.R.,  
1079 Gifford, D.K., and Sherwood, R.I. (2018). Predictable and precise template-free CRISPR editing of  
1080 pathogenic variants. *Nature* 563, 646-651.
- 1081 Solovei, I., Wang, A.S., Thanisch, K., Schmidt, C.S., Krebs, S., Zwerger, M., Cohen, T.V., Devys, D.,  
1082 Foisner, R., Peichl, L., *et al.* (2013). LBR and lamin A/C sequentially tether peripheral heterochromatin  
1083 and inversely regulate differentiation. *Cell* 152, 584-598.
- 1084 Soria, G., and Almouzni, G. (2013). Differential contribution of HP1 proteins to DNA end resection and  
1085 homology-directed repair. *Cell Cycle* 12, 422-429.
- 1086 Sun, Y., Jiang, X., Xu, Y., Ayrapetov, M.K., Moreau, L.A., Whetstine, J.R., and Price, B.D. (2009). Histone  
1087 H3 methylation links DNA damage detection to activation of the tumour suppressor Tip60. *Nat Cell Biol*  
1088 11, 1376-1382.
- 1089 Tsouroula, K., Furst, A., Rogier, M., Heyer, V., Maglott-Roth, A., Ferrand, A., Reina-San-Martin, B., and  
1090 Soutoglou, E. (2016). Temporal and Spatial Uncoupling of DNA Double Strand Break Repair Pathways  
1091 within Mammalian Heterochromatin. *Mol Cell* 63, 293-305.
- 1092 van Overbeek, M., Capurso, D., Carter, M.M., Thompson, M.S., Frias, E., Russ, C., Reece-Hoyes, J.S.,  
1093 Nye, C., Gradia, S., Vidal, B., *et al.* (2016). DNA Repair Profiling Reveals Nonrandom Outcomes at Cas9-  
1094 Mediated Breaks. *Mol Cell* 63, 633-646.
- 1095 van Schaik, T., Vos, M., Peric-Hupkes, D., and van Steensel, B. (2019). Cell cycle dynamics of lamina  
1096 associated DNA. 2019.2012.2019.881979.
- 1097 Villarreal, D.D., Lee, K., Deem, A., Shim, E.Y., Malkova, A., and Lee, S.E. (2012). Microhomology directs  
1098 diverse DNA break repair pathways and chromosomal translocations. *PLoS Genet* 8, e1003026.
- 1099 Vogel, M.J., Peric-Hupkes, D., and van Steensel, B. (2007). Detection of in vivo protein-DNA interactions  
1100 using DamID in mammalian cells. *Nat Protoc* 2, 1467-1478.
- 1101 Yeh, C.D., Richardson, C.D., and Corn, J.E. (2019). Advances in genome editing through control of DNA  
1102 repair pathways. *Nat Cell Biol* 21, 1468-1478.
- 1103 Zorita, E., Cusco, P., and Filion, G.J. (2015). Starcode: sequence clustering based on all-pairs search.  
1104 *Bioinformatics* 31, 1913-1919.  
1105

# Figure 1

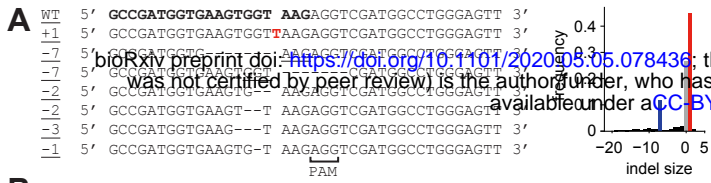

bioRxiv preprint doi: <https://doi.org/10.1101/2020.05.05.078436>; this version posted May 5, 2020. The copyright holder for this preprint (which was not certified by peer review) is the author/funder, who has granted bioRxiv a license to display the preprint in perpetuity. It is made available under aCC-BY-NC-ND 4.0 International license.

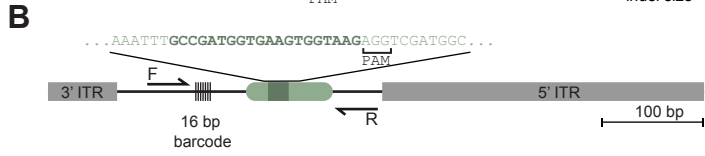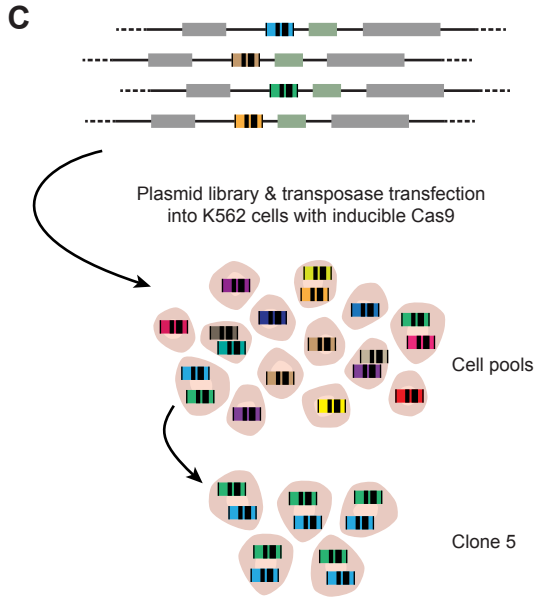

**Figure 2**

**A** bioRxiv preprint doi: <https://doi.org/10.1101/2020.05.05.078436>; this version posted May 5, 2020. The copyright holder for this preprint (which was not certified by peer review) is the author/funder, who has granted bioRxiv a license to display the preprint in perpetuity. It is made available under a [CC-BY-NC-ND 4.0 International license](https://creativecommons.org/licenses/by-nc-nd/4.0/).

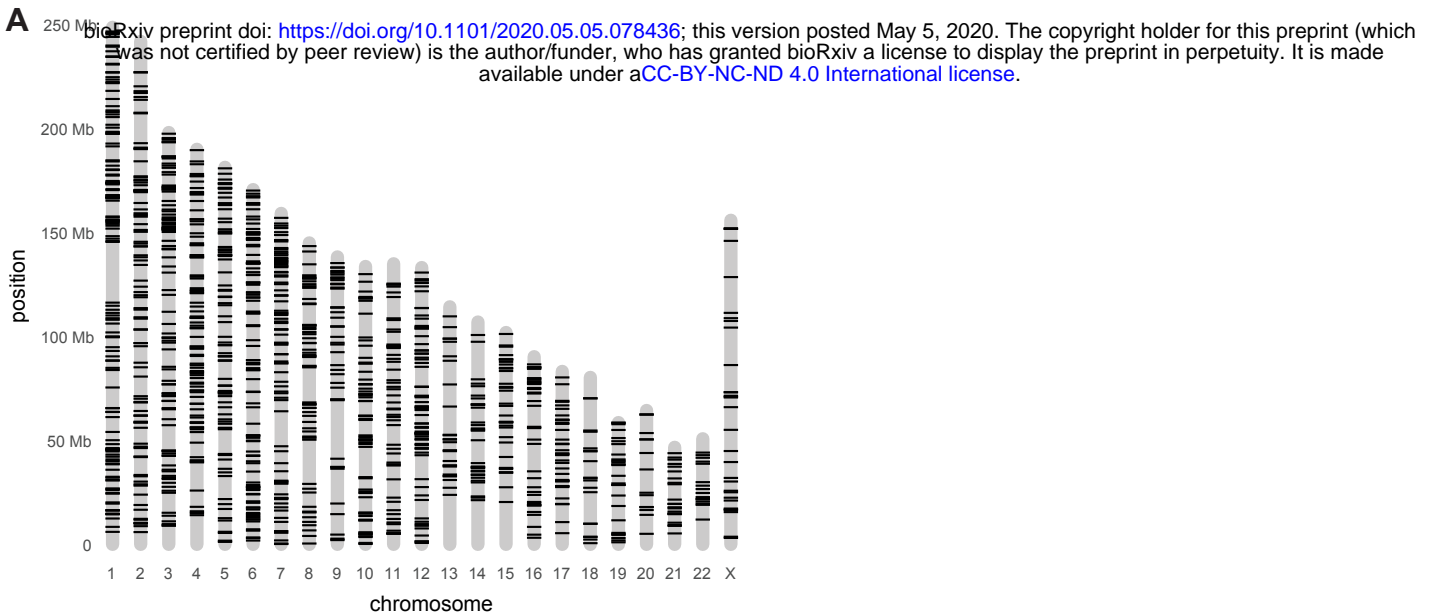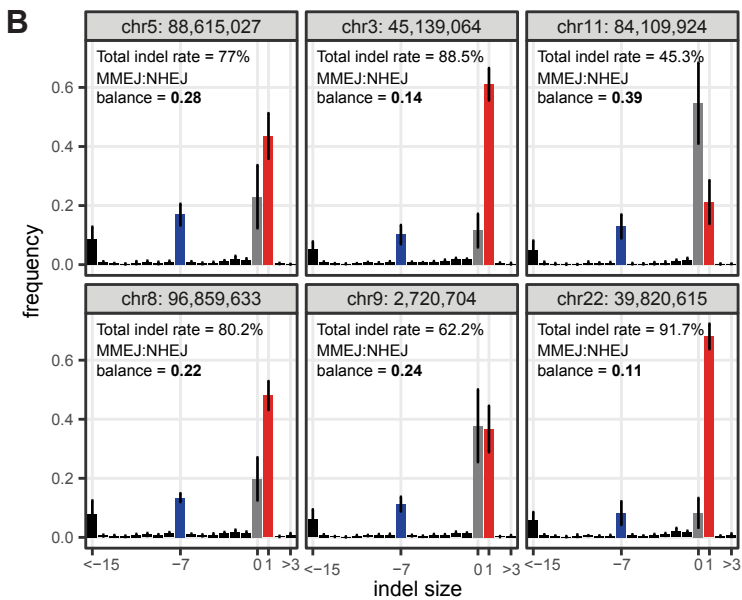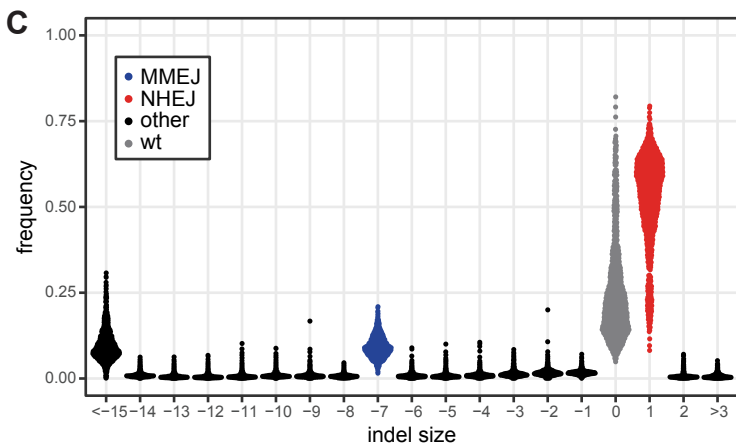

# Figure 3

**A**

bioRxiv preprint doi: <https://doi.org/10.1101/2020.05.05.8436>; this version posted May 5, 2020. The copyright holder for this preprint (which was not certified by peer review) is the author/funder, who has granted bioRxiv a license to display the preprint in perpetuity. It is made available under a [CC-BY-NC-ND 4.0 International license](https://creativecommons.org/licenses/by-nc-nd/4.0/).

**B**

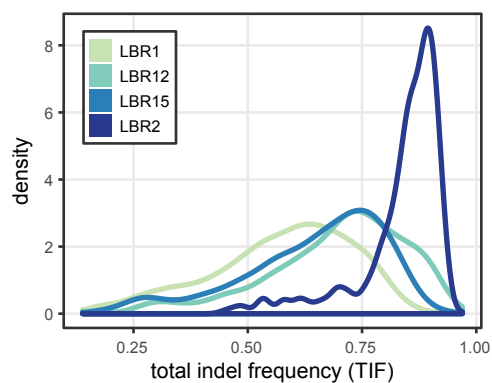

**C**

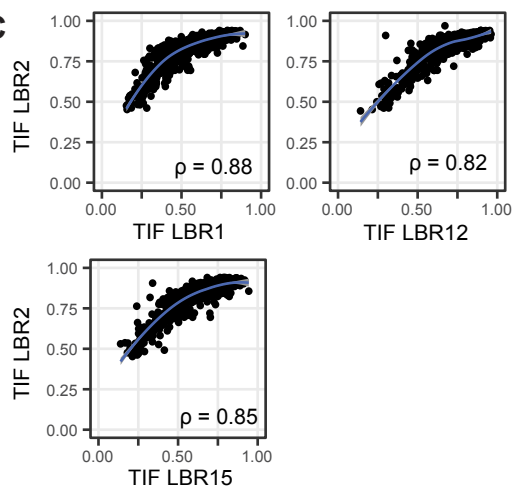

**D**

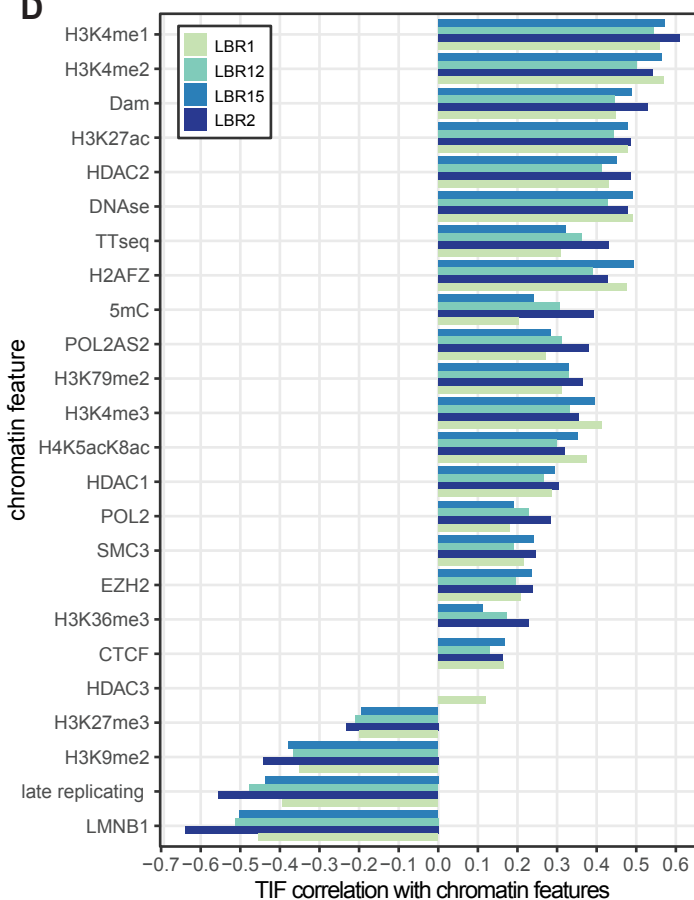

**E**

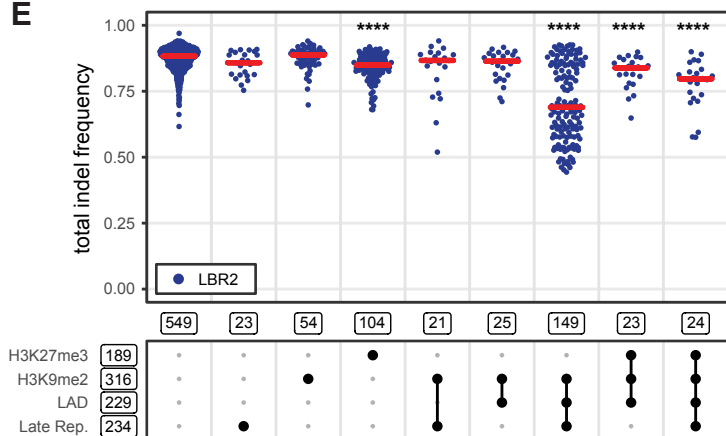

**F**

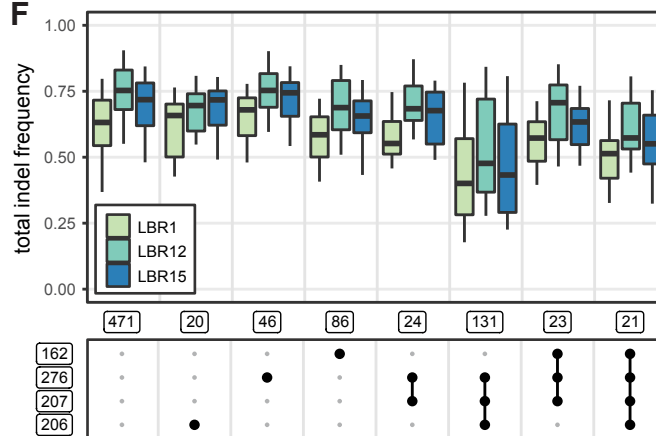



**Figure 4**

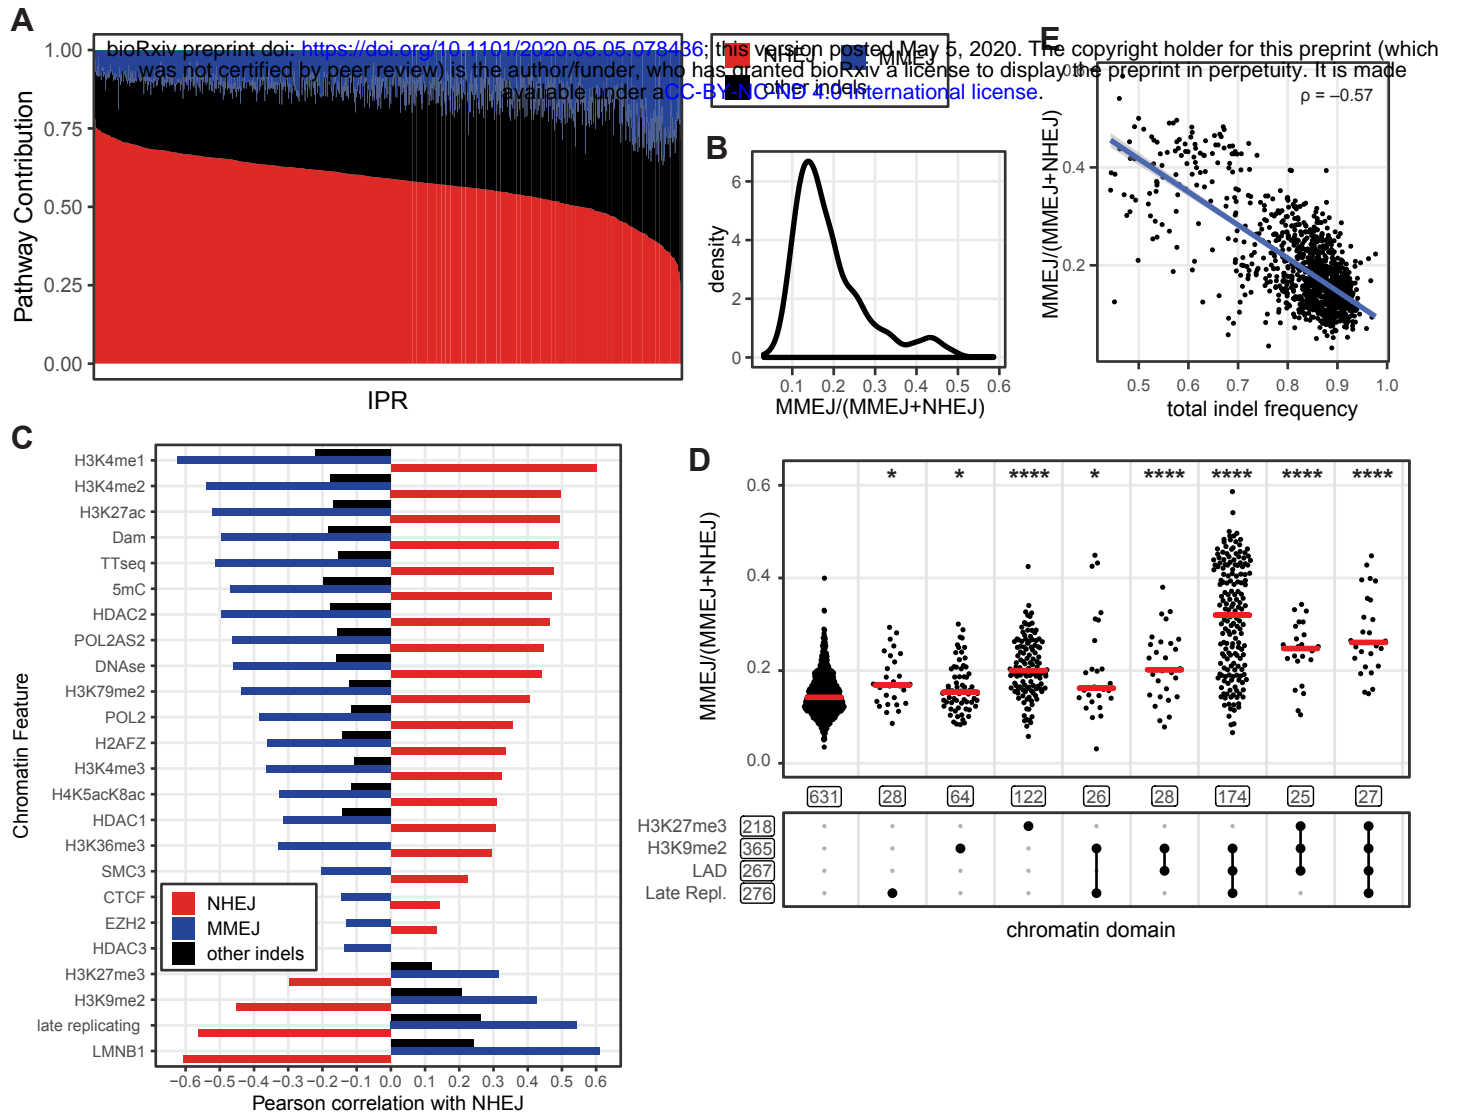

Figure 5

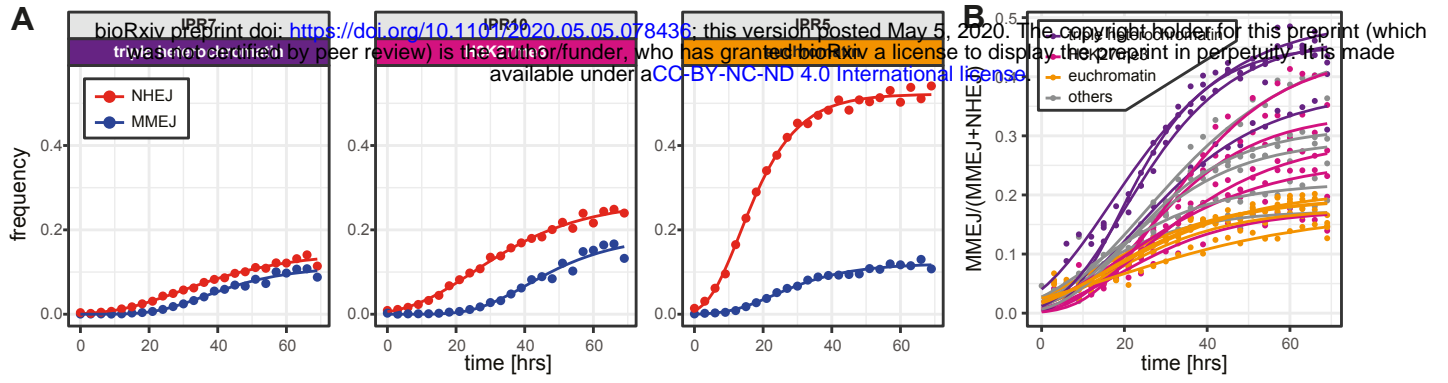

**Figure 6**

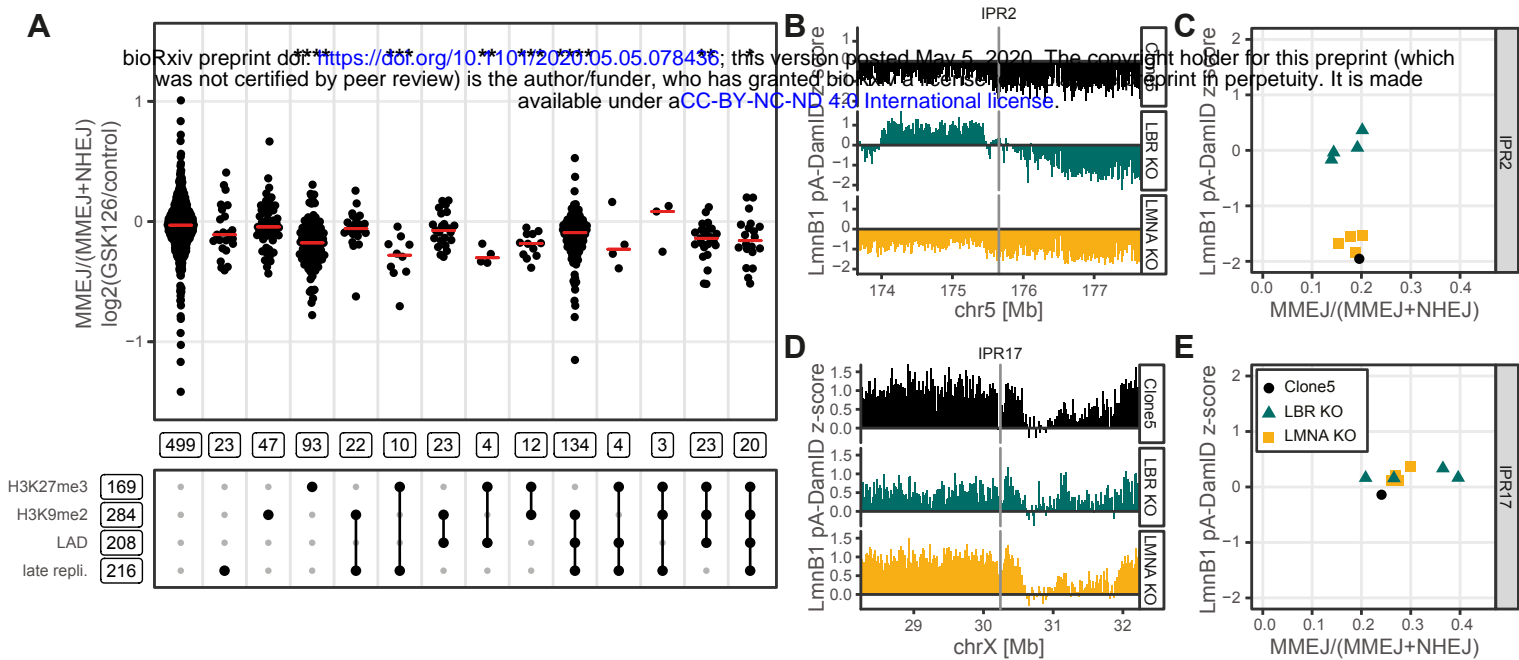

**Figure 7**

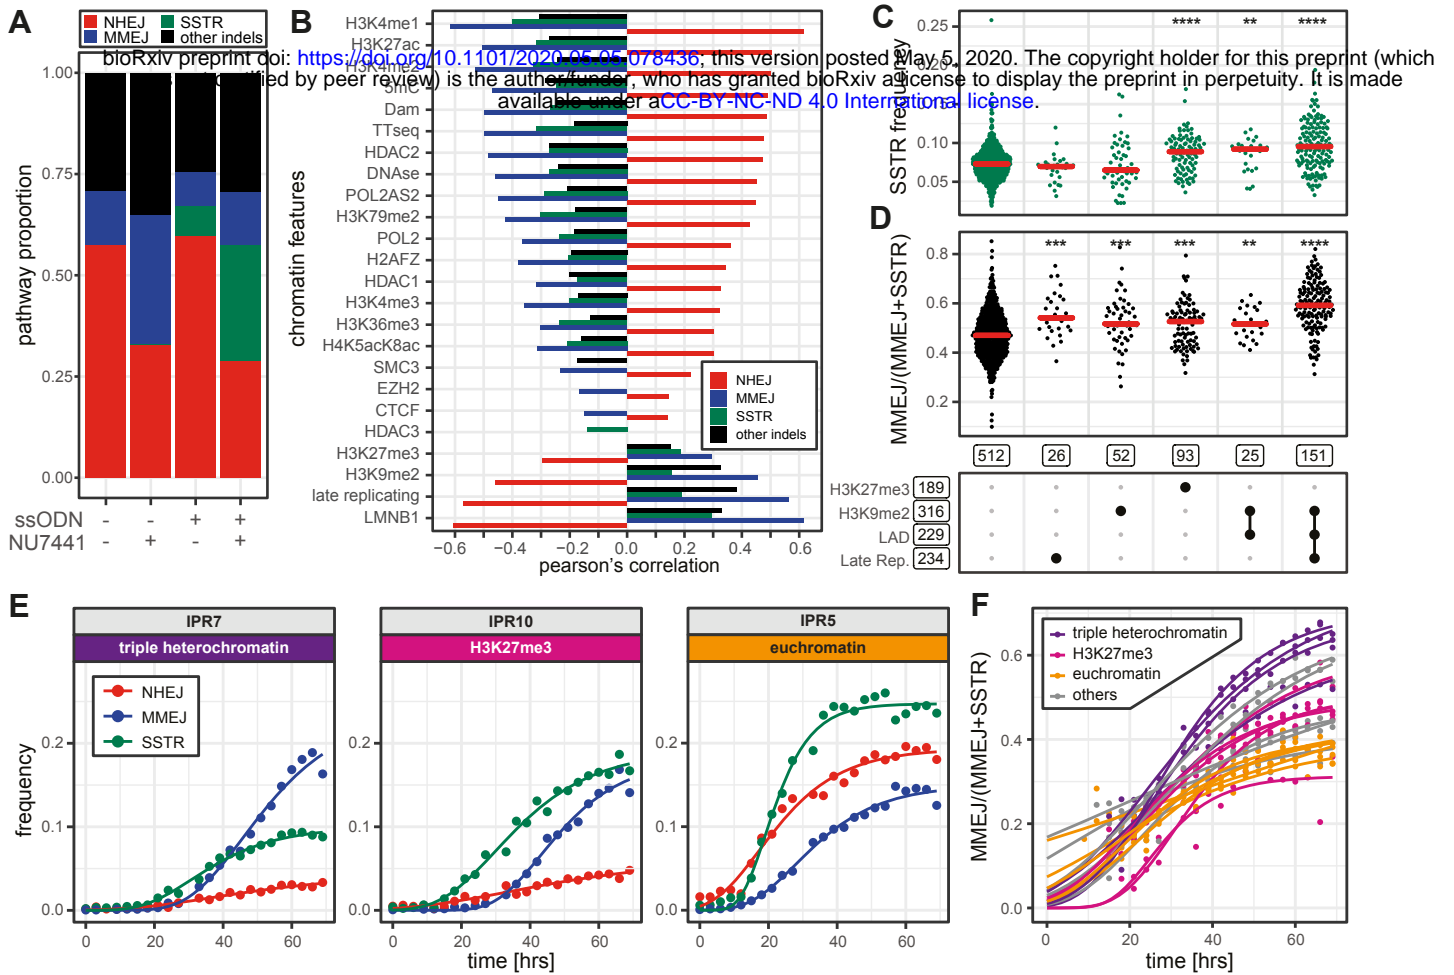

# Supplementary Figure 1

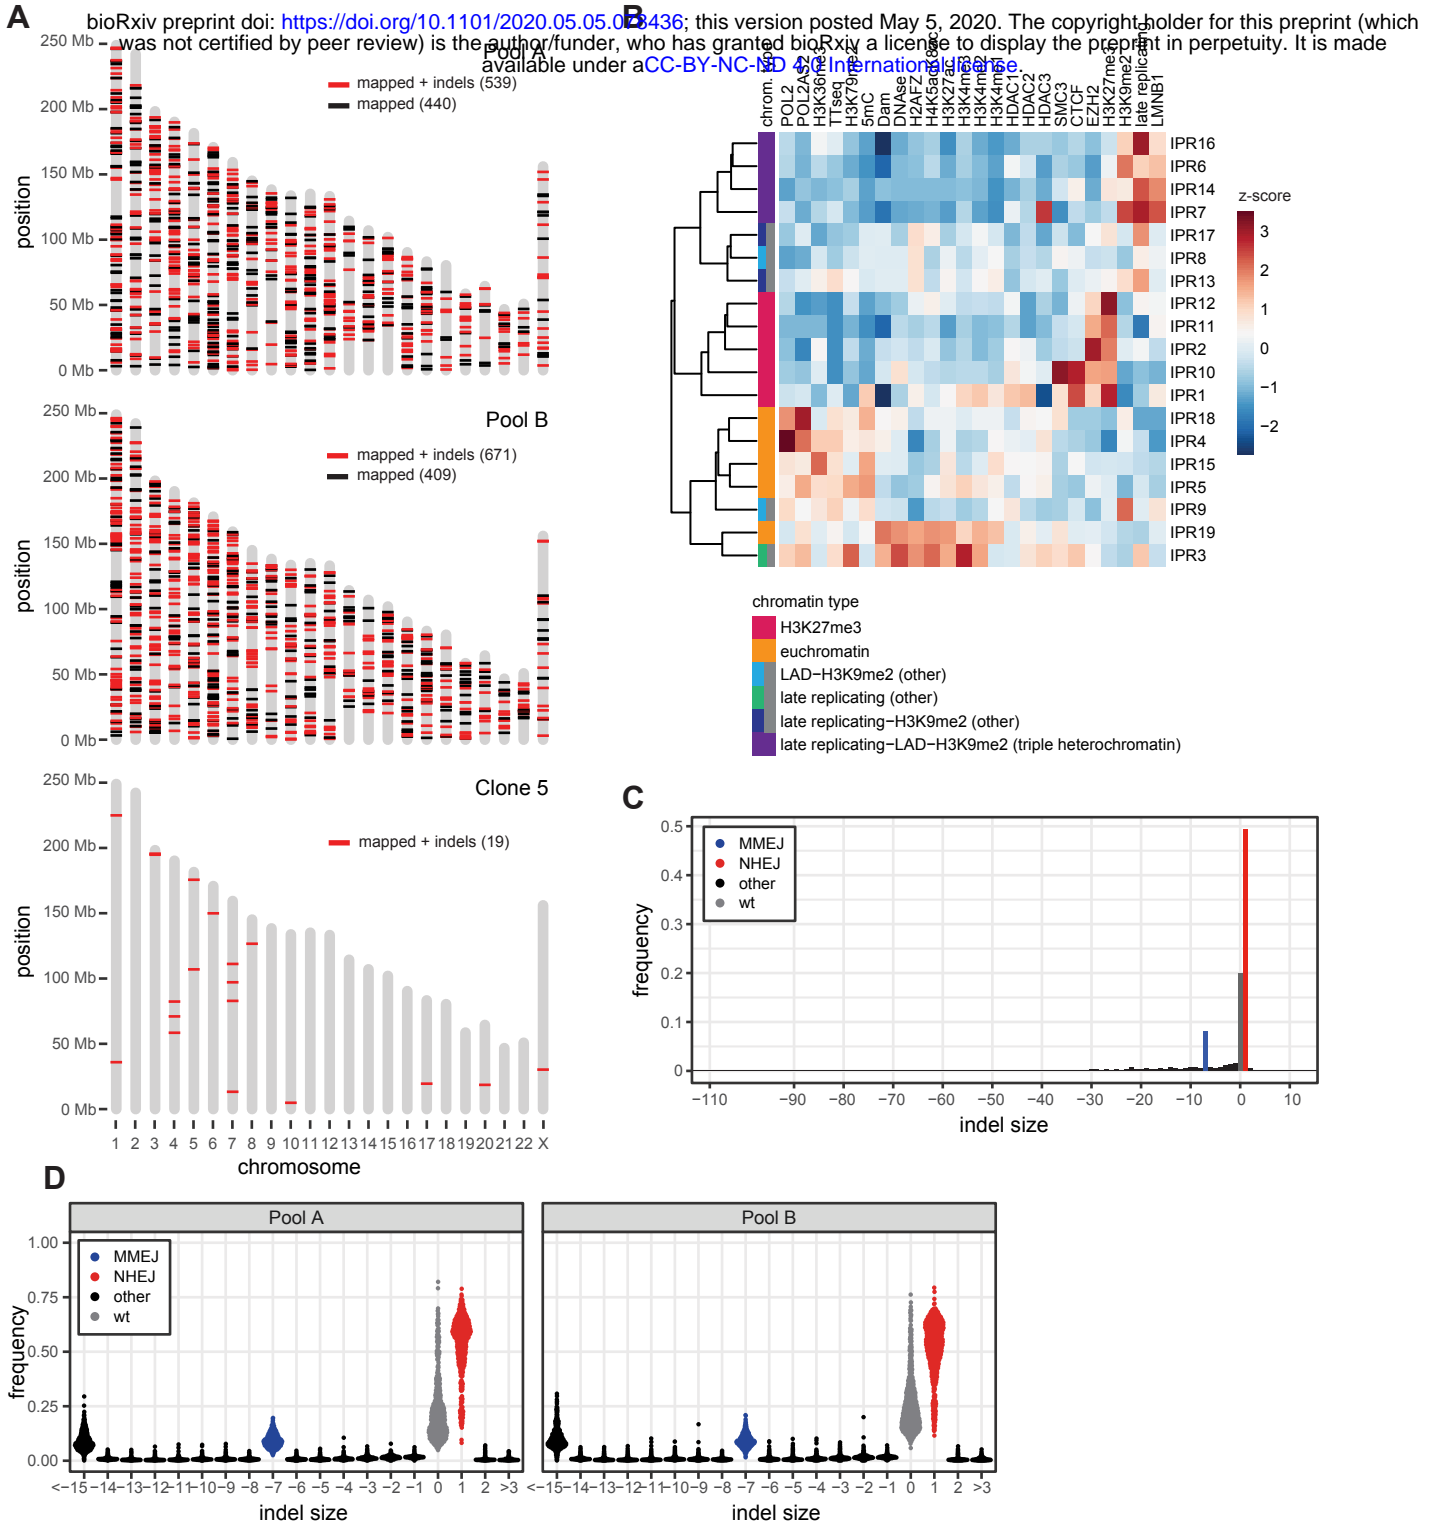

## Supplementary Figure 2

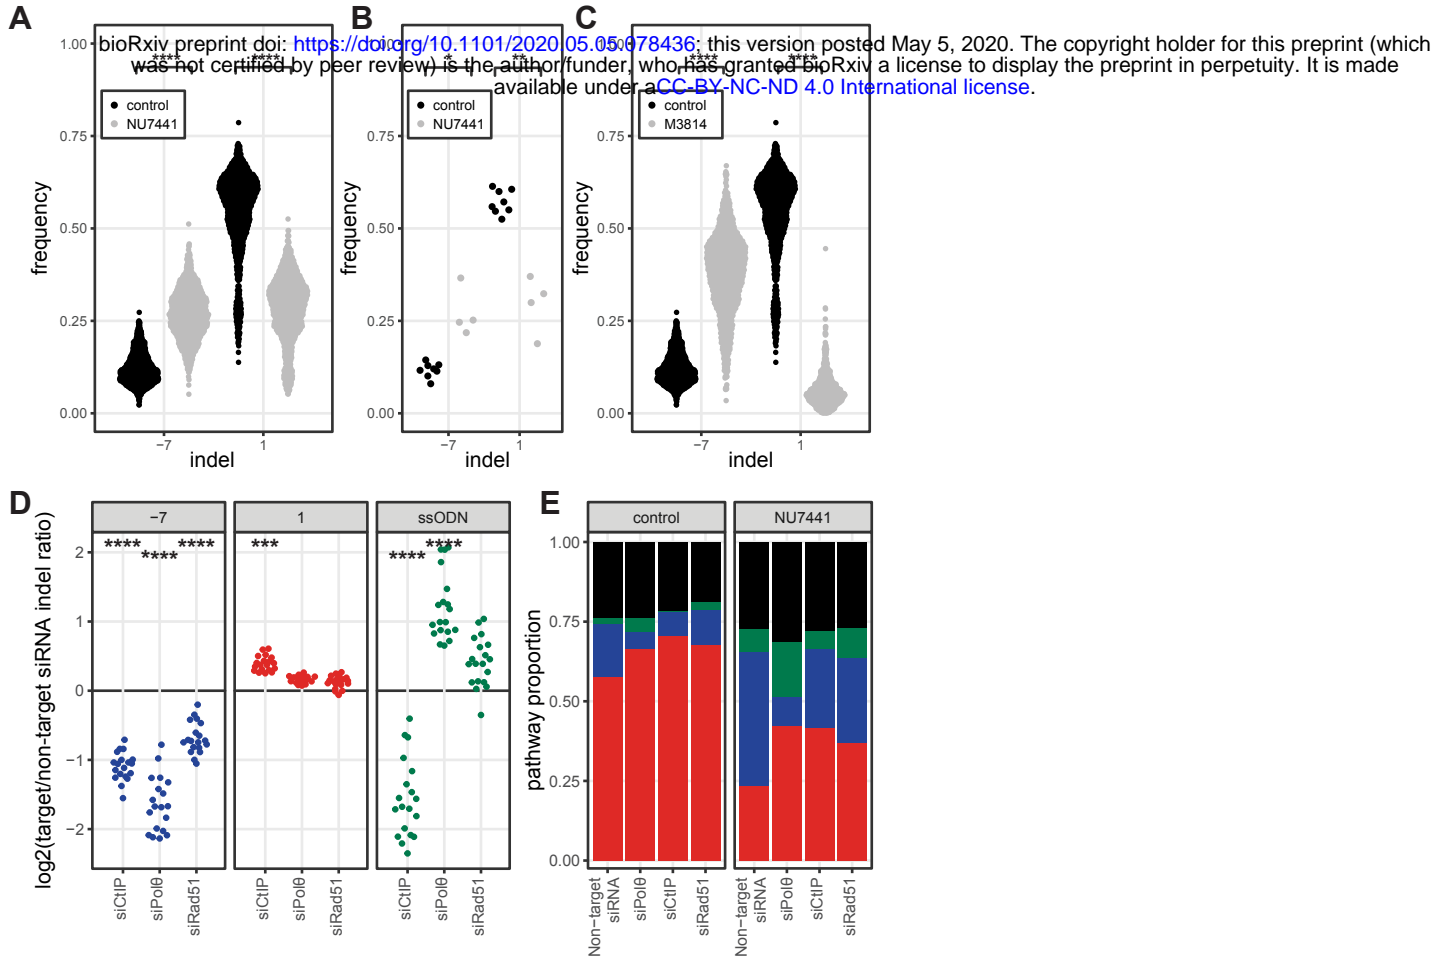

# Supplementary Figure 3

A

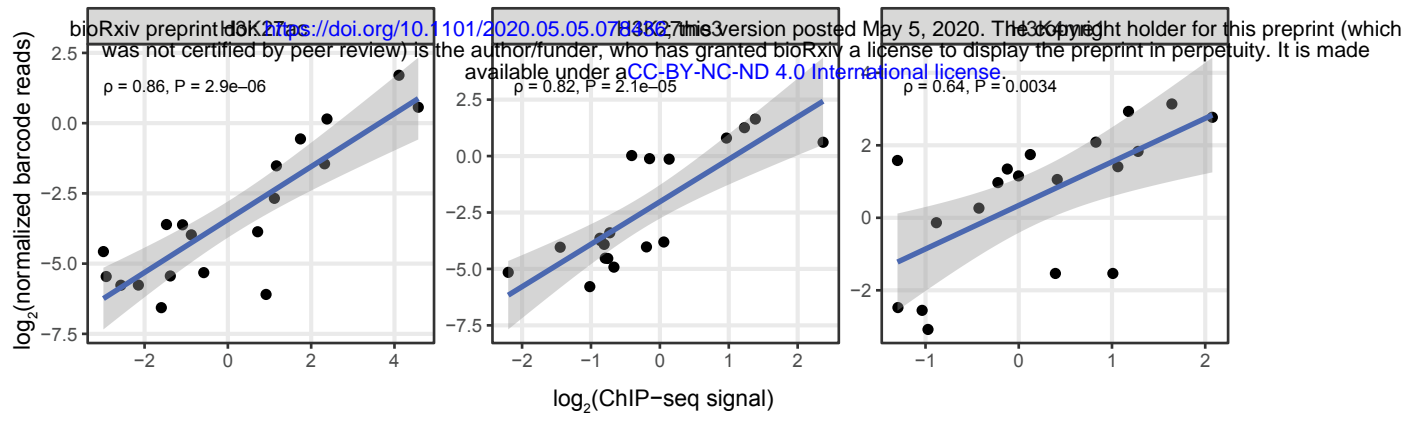

# Supplementary Figure 4

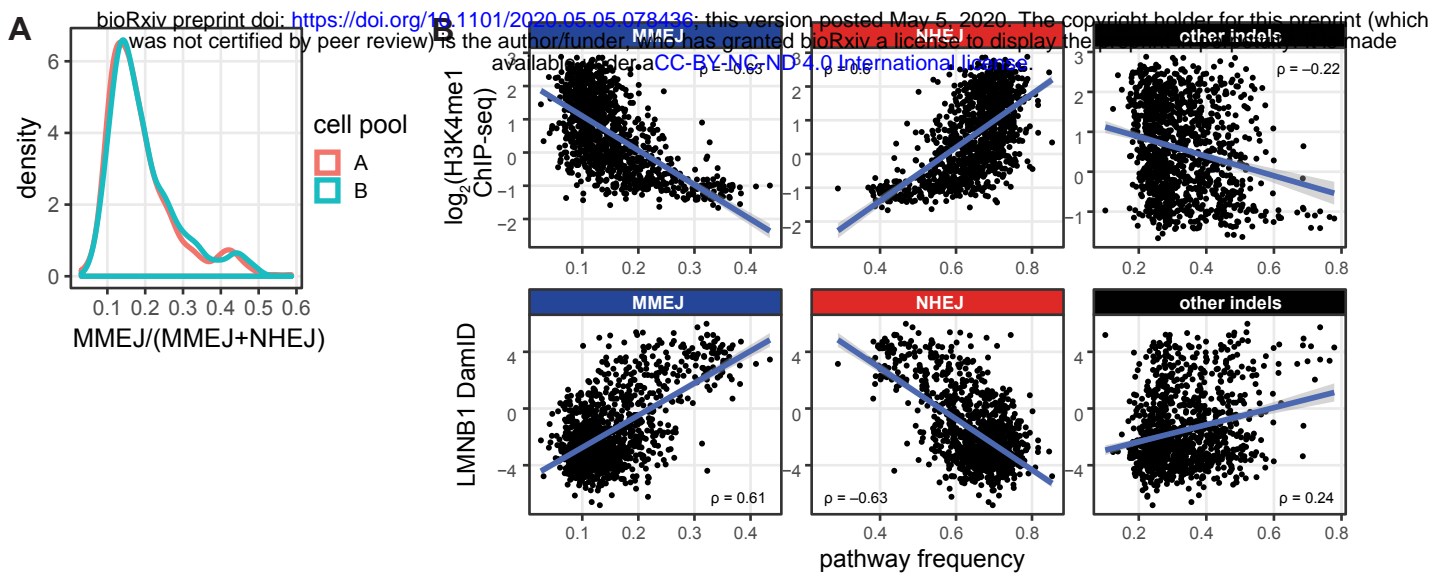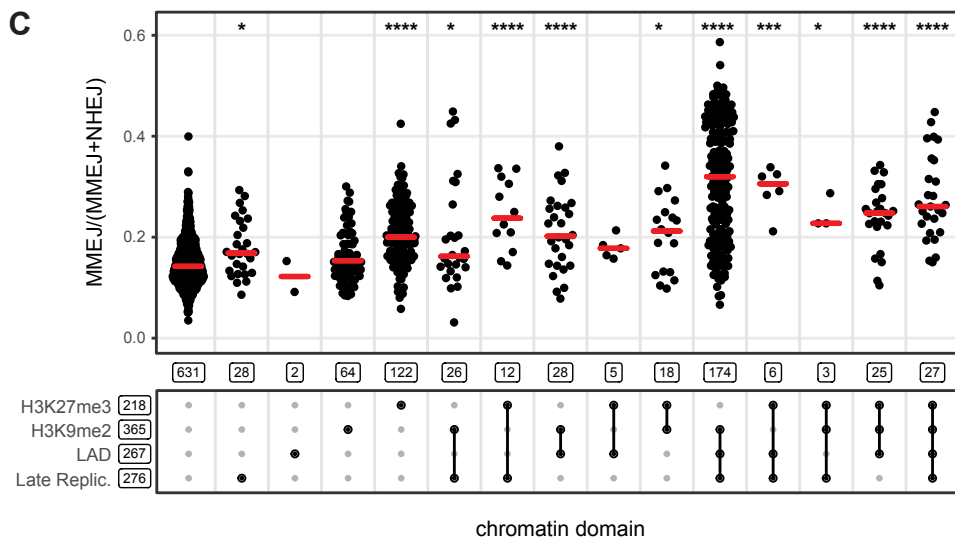



# Supplementary Figure 5

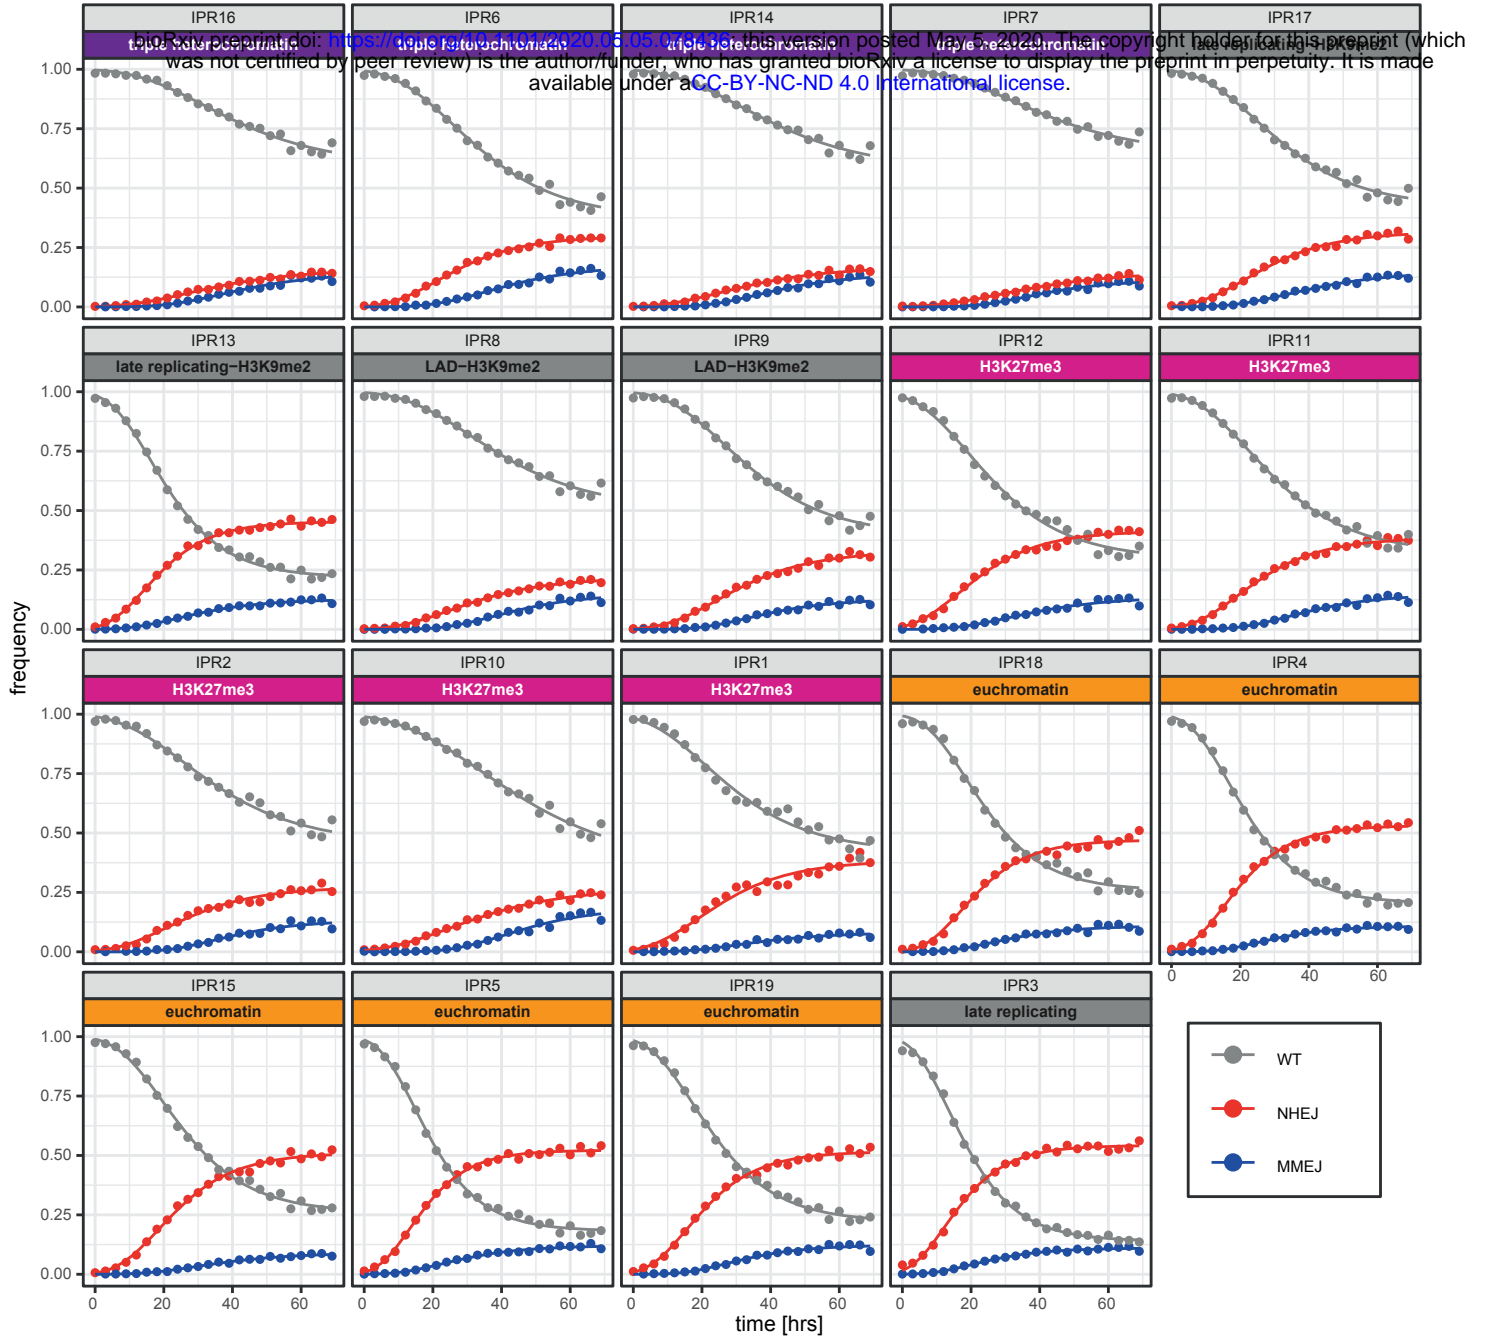

# Supplementary Figure 6

**A**

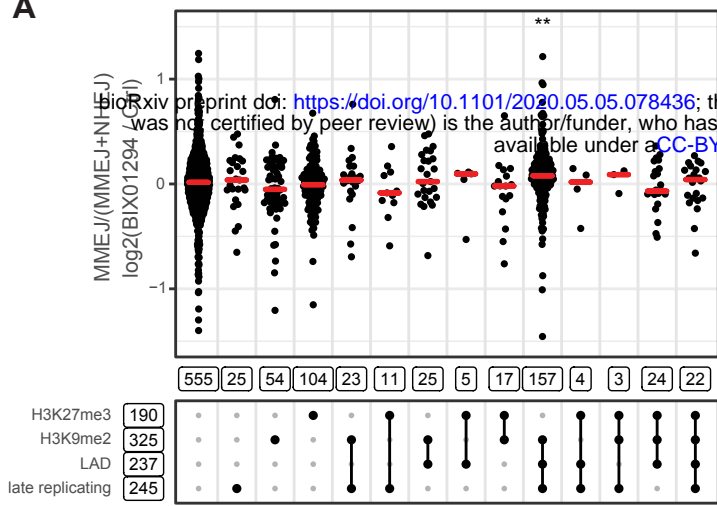

**B**

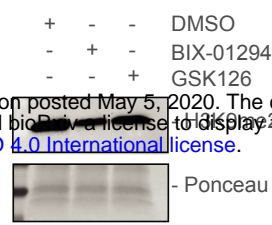

**C**

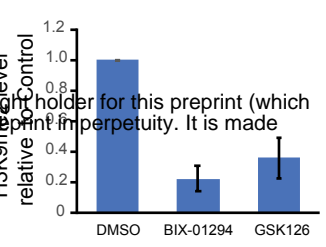

**D**

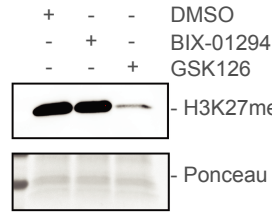

**E**

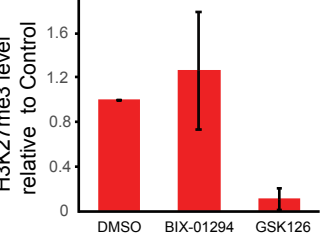

**F**

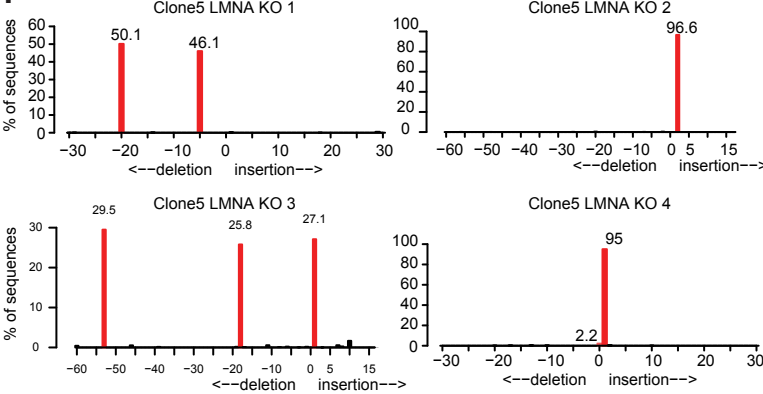

**G**

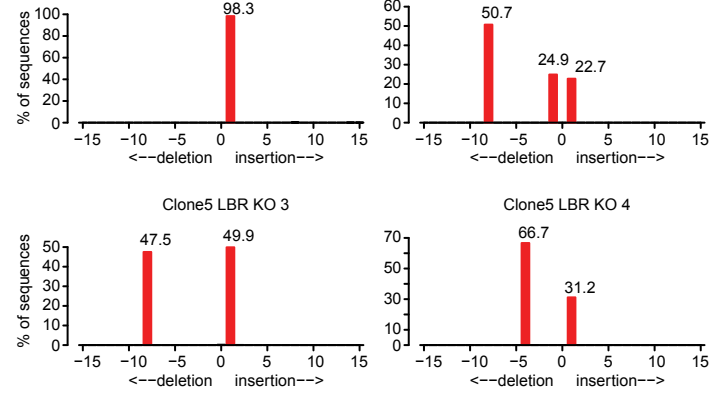

**H**

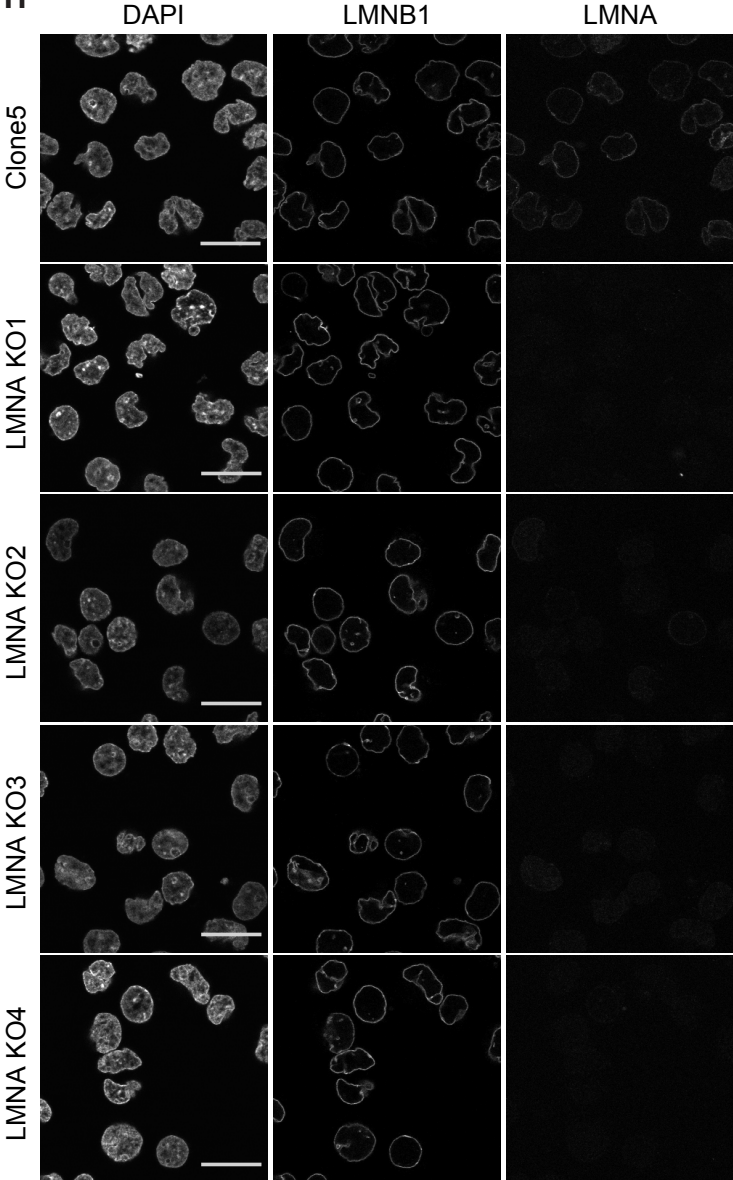

**I**

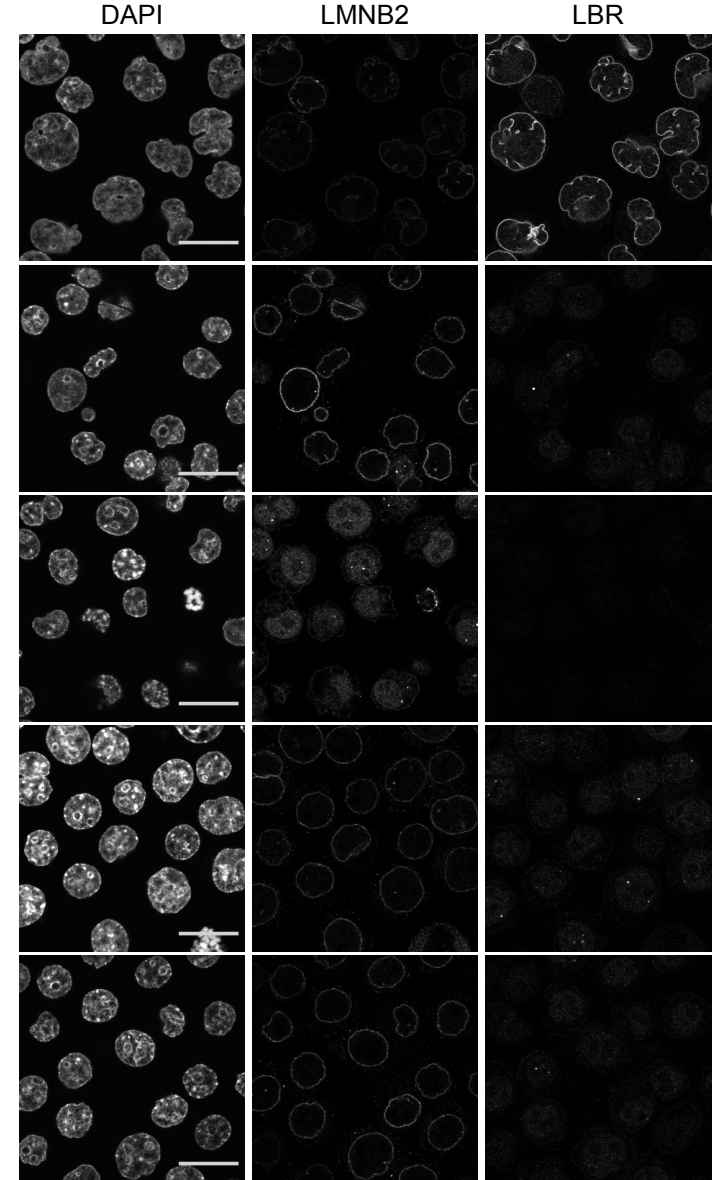

# Supplementary Figure 7

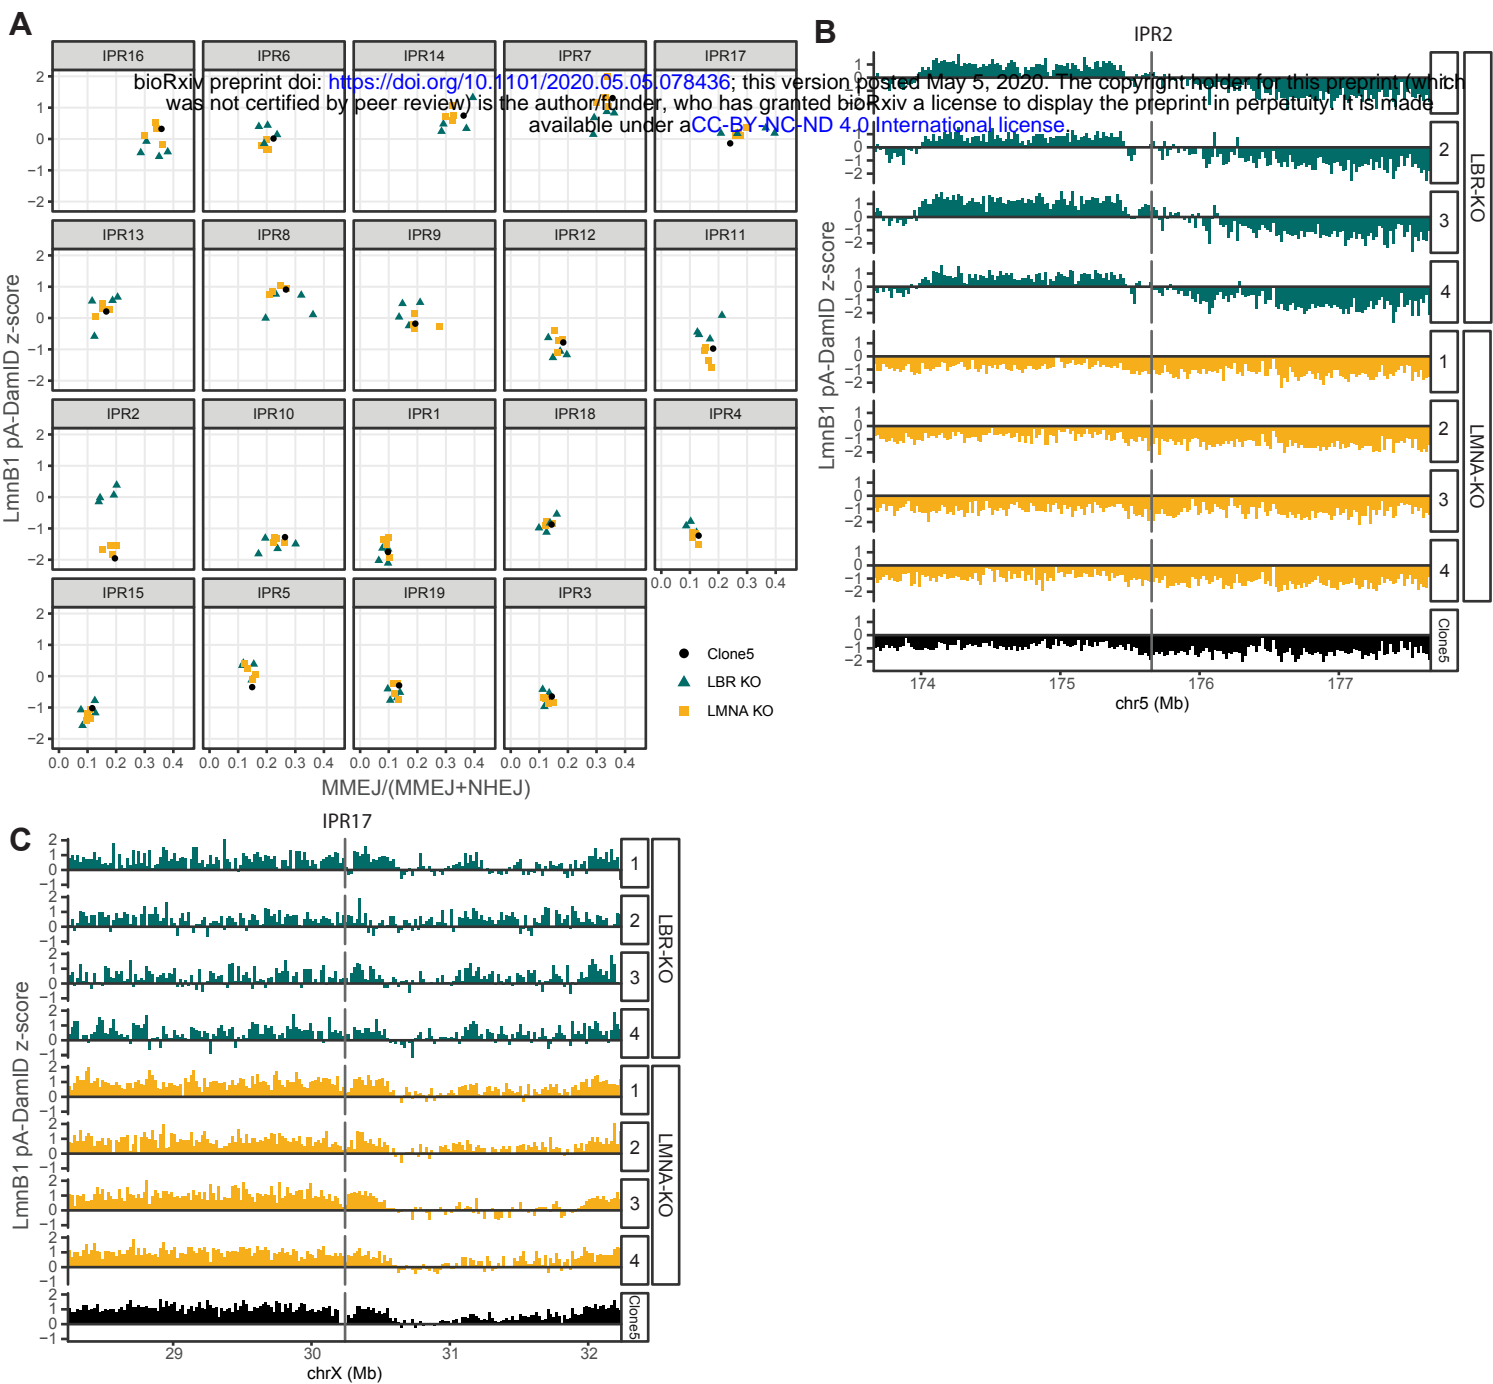

# Supplementary Figure 8

**A**

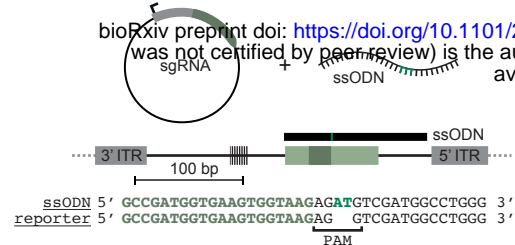

**B**

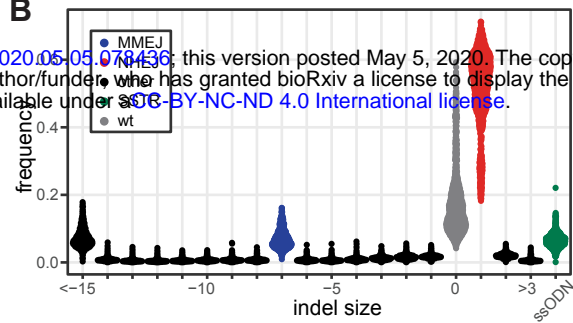

**C**

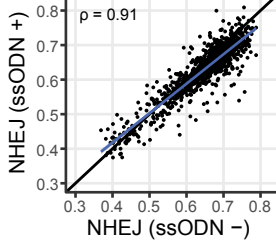

**D**

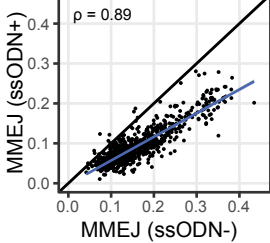

**E**

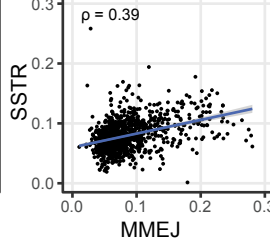

**F**

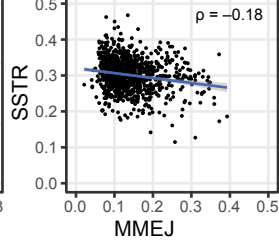

**G**

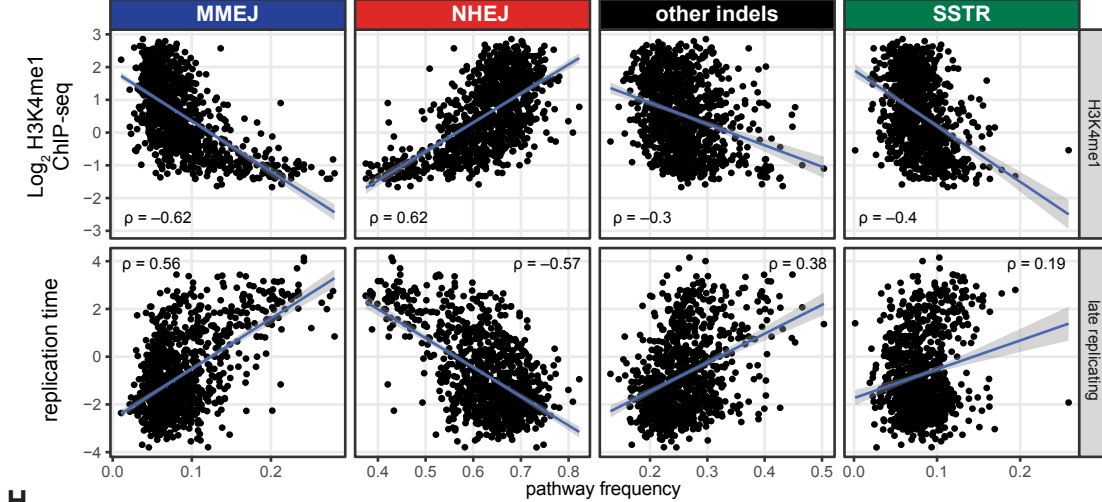

**H**

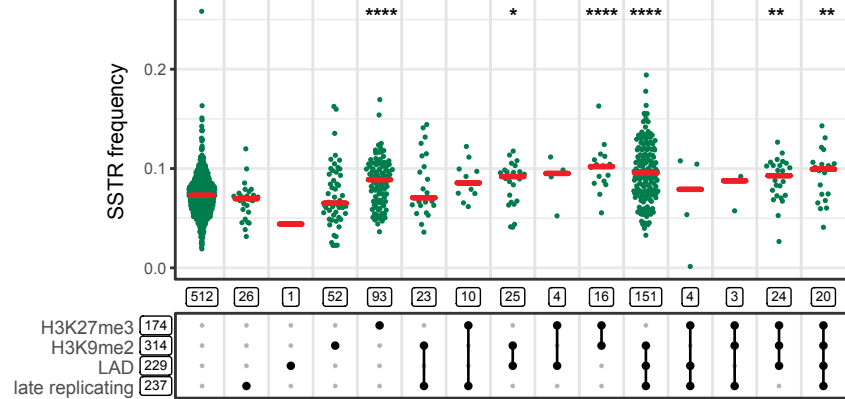

**I**

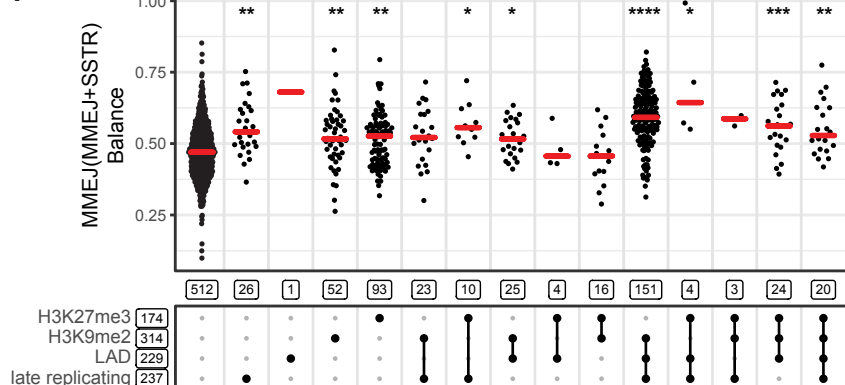

# Supplementary Figure 9

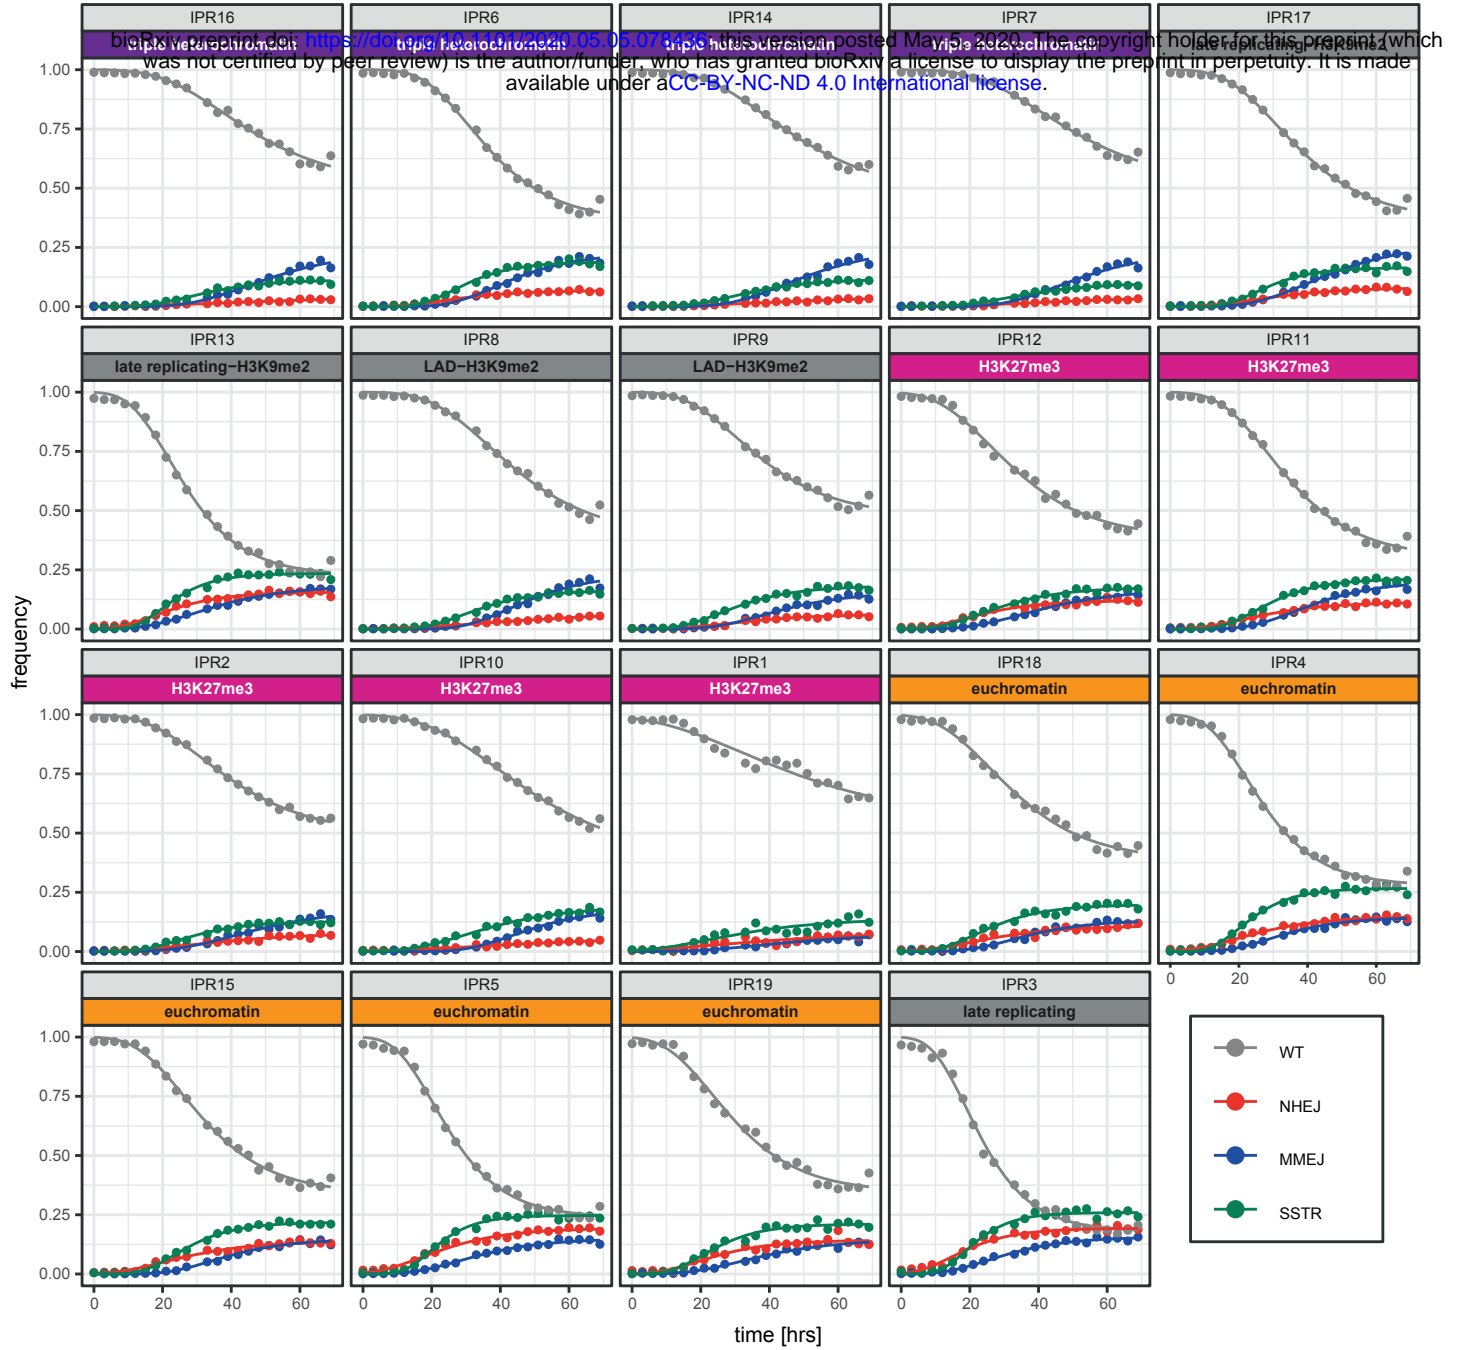

Source: https://www.biorxiv.org/content/10.1101/2020.05.05.078436v1.full.pdf
